# Supplementary material for: Comparative Transcriptomics Analysis of Oral Squamous Cell Carcinoma in Patients from Gujarat and Telangana States, India
Source: Research Square preprint supplement (doi:10.21203/rs.3.rs-6341020/v1), 2025-07-30
Supplement: Supplementary file 1 [file 8b1e461509b36a897a3b7ddc.docx]

**SUPPLEMENTARY DATA**

**Comparative Transcriptomic Analysis of Oral Squamous Cell Carcinoma in Patients from Gujarat and Telangana States, India**

**Niyati Bisht1, Srinivas Bandaru3, Anuraj Nayarisseri1,2***

1. In silico Research Laboratory, Eminent Biosciences,91-A, Sector-A, Mahalakshmi Nagar, Indore-452010, Madhya Pradesh, India

2. Bioinformatics Research Laboratory, LeGene Biosciences Pvt Ltd, 91-A, Sector-A, Mahalakshmi Nagar, Indore-452010, Madhya Pradesh, India

3 Department of Biotechnology, Koneru Lakshmiah Educational Foundation (KLEF), 11 Green Fields, Vaddeswaram, Andhra Pradesh 522302.

*Author for communication email: anuraj@eminentbio.com

1. **Details of SEQUENCE ARCHIVE RUN (Project ID: PRJNA853478, by Gujarat Biotechnology Research Centre, Gujrat, India)**

**Table S1.** Details about Sequence Archive Run (SRR) according to the accession numbers with sequencing data.

| **Run** | **Age** | **Average**  **spot length** | **Bases-giga**  **basepairs** | **Isolate** | **Tissue** | **Date**  **Published** | **Access**  **type** | **Population Phenotype** |
| --- | --- | --- | --- | --- | --- | --- | --- | --- |
| SRR19894447 | 45 | 269 | 1.55Gbp | ZTX45_2020 | Normal | 2022-06-29 | Public | Normal |
| SRR19894448 | 45 | 281 | 1.19Gbp | ZNT45_2020 | Normal | 2022-06-29 | Public | Normal |
| SRR19894449 | 39 | 280 | 1.77Gbp | ZTX43_2020 | Tumor | 2022-06-29 | Public | Tumor |
| SRR19894450 | 39 | 284 | 1.45Gbp | ZNT43_2020 | Normal | 2022-06-29 | Public | Normal |
| SRR19894451 | 48 | 283 | 1.25Gbp | ZTX58_2021 | Tumor | 2022-06-29 | Public | Tumor |
| SRR19894452 | 48 | 279 | 1.72Gbp | ZNT58_2021 | Normal | 2022-06-29 | Public | Normal |
| SRR19894453 | 37 | 285 | 1.73Gbp | ZTX40_2020 | Tumor | 2022-06-29 | Public | Tumor |
| SRR19894454 | 37 | 280 | 1.93Gbp | ZNT40_2020 | Normal | 2022-06-29 | Public | Normal |


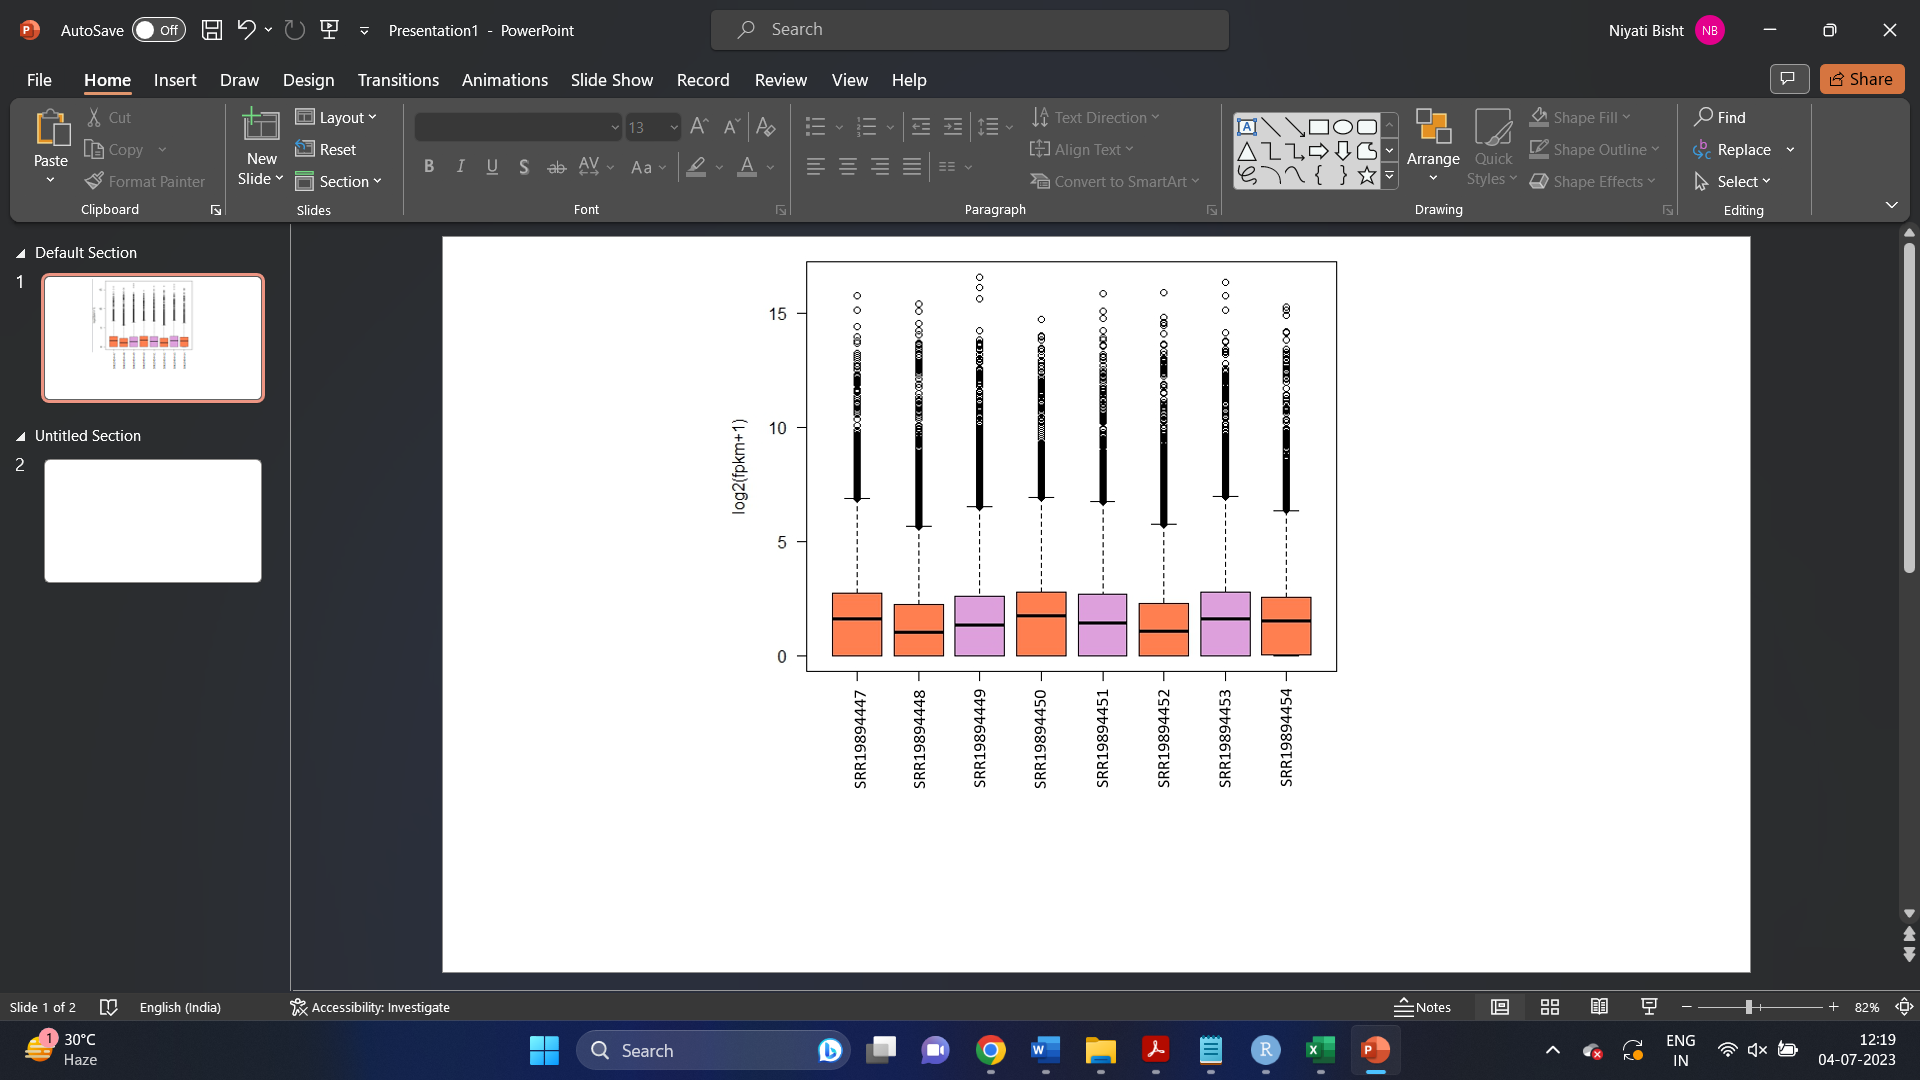


**Figure S1. Total reads represented as a function of FPKM values across all the samples.** The black line in each box represents the median value for FPKM values in each sample.

1. **Quality control of the FastQ files**

For quality check, the FastQC format provided a rapid assessment of the read quality, encompassing various features such as sequence quality, N content, GC content, adapter contamination, duplication levels, and statistical information. An overview of the FastQC results is shown in Table S2 and figure S2.

**Table S2. Overview of the FastQC results.** The table summarizes the total sequences, per base sequence quality, sequence GC content, and per base N-content (The highlighted ones are the tumour samples)

| **Run** | **Basic statistics**  **(Total sequence)** | **Per-base-sequence quality** | **Sequence-GC content (%)** | **Per-base-N content** |
| --- | --- | --- | --- | --- |
| SRR19894447 | 5743048 | 28-40 | 55 | Nil |
| SRR19894448 | 4213119 | 28-40 | 54 | Nil |
| SRR19894449 | 6318879 | 30-40 | 54 | Nil |
| SRR19894450 | 511476 5 | 30-40 | 52 | Nil |
| SRR19894451 | 4389821 | 32-40 | 53-54 | Nil |
| SRR19894452 | 6161269 | 32-40 | 54 | Nil |
| SRR19894453 | 6064421 | 32-40 | 54-55 | Nil |
| SRR19894454 | 6876009 | 32-40 | 53-54 | Nil |


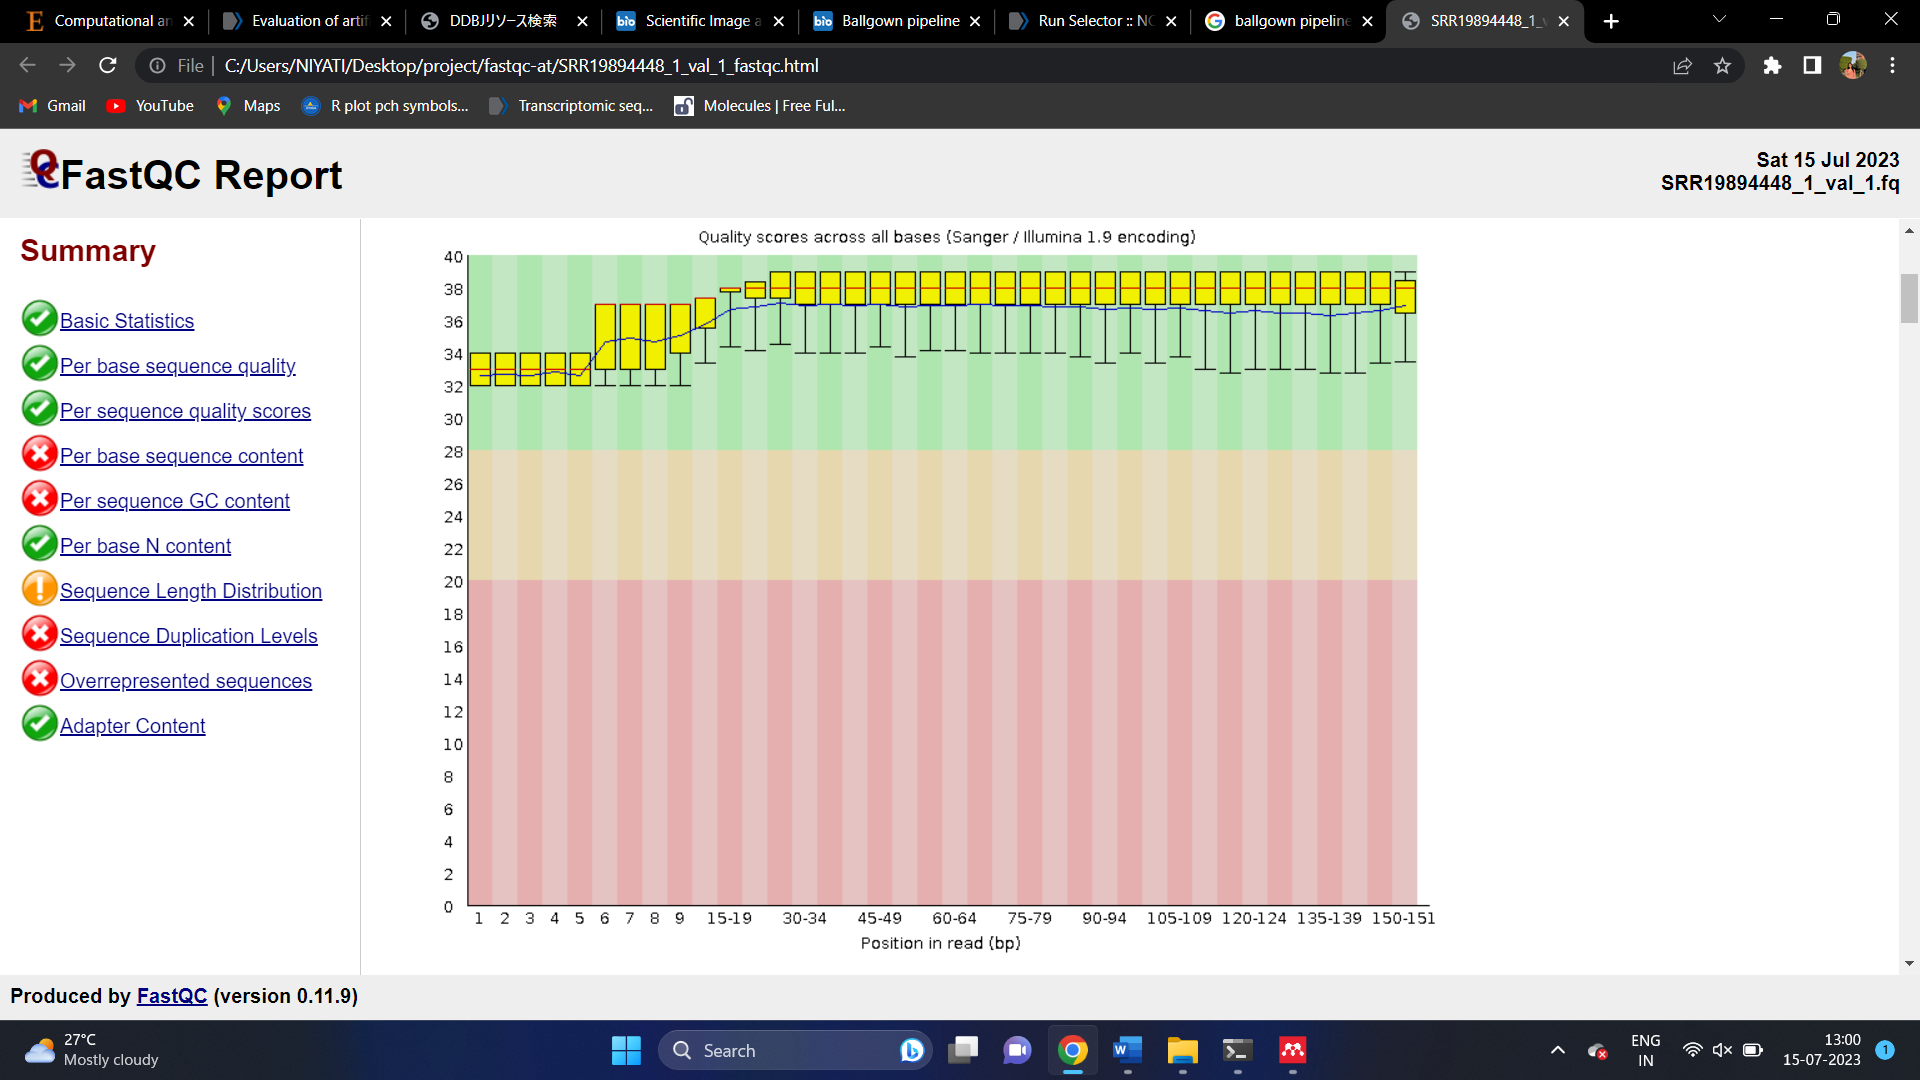


**Figure S2. Post-trimming FastQC report.** The trimming of the read was performed by TrimGalore wrappers and the quality check can be done post-trimming. All the reads have a quality score of more than 30 and the reads less than 30 were trimmed.
