# Supplementary material for: Comparative Transcriptomics Analysis of Oral Squamous Cell Carcinoma in Patients from Gujarat and Telangana States, India
Source: Research Square preprint supplement (doi:10.21203/rs.3.rs-6341020/v1), 2025-07-30
Supplement: Supplementary file 2 [file 91c02aa85727f9fabc9de738.xlsx]

## Sheet: qRT PCR PRIMERS
Gene	Transcript ID		Sequence	Start	Length	Tm	GC Percent	Amplicon size
NCBP2	NM_001042540.2	Forward Primer	ACGCCATGCGGTACATAAA	153	19	62.065	47.368	316
		Reverse Primer	GAGGCTTCCAGCTCAGTAAAG	468	21	62.221	52.381
TP53	NM_001276761.3	Forward Primer	AGTCTACCTCCCGCCATAAA	1263	20	62.448	50	312
		Reverse Primer	CCCAAACATCCCTCACAGTAAA	1574	22	62.451	45.455
PTEN	NM_000314.8	Forward Primer	GTCAGAGGCGCTATGTGTATTA	1354	22	61.697	45.455	349
		Reverse Primer	GTTTCCTCTGGTCCTGGTATG	1702	21	61.754	52.381
AURKB	NM_001313950	Forward Primer	TCCTCTTCAAGTCCCAGATAGA	367	22	61.868	45.455	264
		Reverse Primer	TCTTCCCATGGCAGTACATTAG	630	22	61.787	45.455
RB1	NM_000321	Forward Primer	CTGTCTGAGCACCCAGAATTAG	2170	22	62.232	50	357
		Reverse Primer	GCTTCGAGGAATGTGAGGTATT	2526	22	62.219	45.455
NOTCH1	NM_017617	Forward Primer	AGGGAAGTTGAACGAGCATAG	8328	21	61.875	47.619	293
		Reverse Primer	GCATACACACTCCGAGAACA	8620	20	61.74	50
