# Supplementary material for: Comparative Transcriptomics Analysis of Oral Squamous Cell Carcinoma in Patients from Gujarat and Telangana States, India
Source: Research Square preprint supplement (doi:10.21203/rs.3.rs-6341020/v1), 2025-07-30
Supplement: Supplementary file 3 [file f95329b482942610fc16bfa1.xlsx]

## Sheet: NCBP2
Sample Name		Target Name (Endogenous Control)	Cт Value (Duplicate)		Cт Mean (GAPDH)	Target Name (Gene of Interest)	Cт Value (Duplicate)		Cт Mean (LAG3)	Fold Change Calculation (FC=2^-ΔΔCt)
	STAGING									ΔCt	ΔΔCt	Fold Change				Healthy Tissue	BC Tissue
Healthy Tissue (Control) - 1	STAGE 1	GAPDH	17.6225	17.0098	17.3162	NCBP2	18.5996	17.2236	17.9116	0.595467	0.627334	0.647372
Healthy Tissue (Control) - 2	STAGE 1	GAPDH	18.7585	17.3756	18.0671	NCBP2	18.277	18.4192	18.3481	0.281033	0.312899	0.805022			AVERAGE	1.13369	0.90716
Healthy Tissue (Control) - 3	STAGE 1	GAPDH	18.7914	18.6579	18.7246	NCBP2	19.7628	19.3652	19.564	0.839382	0.871248	0.546674			SD	0.578478	0.504708
Healthy Tissue (Control) - 4	STAGE 1	GAPDH	17.4115	18.1961	17.8038	NCBP2	18.0049	18.7468	18.3758	0.572011	0.603878	0.657983			SE	0.182931	0.159603
Healthy Tissue (Control) - 5	STAGE 1	GAPDH	17.6222	17.0088	17.3155	NCBP2	18.7812	18.3255	18.5534	1.23788	1.26974	0.414733			average of delta Ct of Control		-0.0318666
Healthy Tissue (Control) - 6	STAGE 1	GAPDH	18.2228	18.7233	18.473	NCBP2	19.7628	19.3652	19.564	1.09102	1.12289	0.459173
Healthy Tissue (Control) - 7	STAGE 1	GAPDH	18.9155	18.7168	18.8161	NCBP2	18.0049	18.7468	18.3758	-0.440333	-0.408467	1.32727
Healthy Tissue (Control) - 8	STAGE 1	GAPDH	18.7914	18.6679	18.7296	NCBP2	18.7588	17.4625	18.1107	-0.618998	-0.587132	1.50226
Healthy Tissue (Control) - 9	STAGE 1	GAPDH	17.6222	17.0082	17.3152	NCBP2	18.5843	17.6322	18.1082	0.793021	0.824888	0.564526
Healthy Tissue (Control) - 10	STAGE 1	GAPDH	18.7588	17.3956	18.0772	NCBP2	18.7588	17.4625	18.1107	0.0334262	0.0652928	0.955751
Healthy Tissue (Control) - 11	STAGE 2	GAPDH	18.7588	17.3956	18.0772	NCBP2	18.0406	17.6525	17.8466	-0.230654	-0.198788	1.14773
Healthy Tissue (Control) - 12	STAGE 2	GAPDH	18.7914	18.6679	18.7296	NCBP2	16.7168	17.9155	17.3161	-1.4135	-1.38164	2.60564
Healthy Tissue (Control) - 13	STAGE 2	GAPDH	17.4005	18.1961	17.7983	NCBP2	18.5996	17.3336	17.9666	0.168327	0.200194	0.870434
Healthy Tissue (Control) - 14	STAGE 2	GAPDH	18.1835	18.2595	18.2215	NCBP2	18.277	18.4292	18.3531	0.13161	0.163477	0.892871
Healthy Tissue (Control) - 15	STAGE 2	GAPDH	18.3956	18.7588	18.5772	NCBP2	19.7728	19.3652	19.569	0.99181	1.02368	0.491861
Healthy Tissue (Control) - 16	STAGE 2	GAPDH	18.2228	18.7233	18.473	NCBP2	18.7812	18.3255	18.5534	0.0803635	0.11223	0.925157
Healthy Tissue (Control) - 17	STAGE 2	GAPDH	18.9155	18.7168	18.8161	NCBP2	18.5996	17.3336	17.9666	-0.849518	-0.817651	1.76253
Healthy Tissue (Control) - 18	STAGE 2	GAPDH	18.5973	18.3557	18.4765	NCBP2	16.7168	17.9155	17.3161	-1.16034	-1.12847	2.18627
Healthy Tissue (Control) - 19	STAGE 2	GAPDH	18.9155	18.7168	18.8161	NCBP2	18.0149	18.7268	18.3708	-0.445333	-0.413467	1.33188
Healthy Tissue (Control) - 20	STAGE 2	GAPDH	18.7814	18.6579	18.7196	NCBP2	18.7812	18.3255	18.5534	-0.166277	-0.13441	1.09764
Healthy Tissue (Control) - 21	STAGE 3	GAPDH	17.4015	18.1962	17.7989	NCBP2	18.5844	17.6323	18.1083	0.309466	0.341332	0.789312
Healthy Tissue (Control) - 22	STAGE 3	GAPDH	18.5973	18.3457	18.4715	NCBP2	18.7588	17.4626	18.1107	-0.36078	-0.328914	1.25607
Healthy Tissue (Control) - 23	STAGE 3	GAPDH	18.1835	18.2595	18.2215	NCBP2	18.0416	17.6535	17.8476	-0.373912	-0.342045	1.26755
Healthy Tissue (Control) - 24	STAGE 3	GAPDH	18.2956	18.7588	18.5272	NCBP2	16.7168	17.9155	17.3161	-1.21107	-1.17921	2.26452
Healthy Tissue (Control) - 25	STAGE 3	GAPDH	18.2328	18.7223	18.4775	NCBP2	18.5996	17.2436	17.9216	-0.555881	-0.524014	1.43795
Healthy Tissue (Control) - 26	STAGE 3	GAPDH	18.1835	18.2595	18.2215	NCBP2	18.277	18.6192	18.4481	0.22661	0.258477	0.83597
Healthy Tissue (Control) - 27	STAGE 3	GAPDH	18.2956	18.7588	18.5272	NCBP2	19.7928	19.3642	19.5785	1.05131	1.08318	0.471987
Healthy Tissue (Control) - 28	STAGE 3	GAPDH	18.9155	18.9168	18.9161	NCBP2	18.5996	17.2436	17.9216	-0.994518	-0.962651	1.94889
Healthy Tissue (Control) - 29	STAGE 3	GAPDH	18.5973	18.3557	18.4765	NCBP2	18.277	18.6192	18.4481	-0.0283984	0.00346828	0.997599
Healthy Tissue (Control) - 30	STAGE 3	GAPDH	18.1835	18.3595	18.2715	NCBP2	18.1149	18.7478	18.4313	0.159835	0.191701	0.875572
Healthy Tissue (Control) - 31	STAGE4	GAPDH	18.3957	18.9588	18.6772	NCBP2	18.7812	18.3256	18.5534	-0.123861	-0.0919941	1.06584
Healthy Tissue (Control) - 32	STAGE4	GAPDH	18.3228	18.7224	18.5226	NCBP2	18.5883	17.6322	18.1102	-0.412348	-0.380481	1.30178
Healthy Tissue (Control) - 33	STAGE4	GAPDH	17.6222	17.0082	17.3152	NCBP2	18.7588	17.4625	18.1107	0.795455	0.827322	0.563574
Healthy Tissue (Control) - 34	STAGE4	GAPDH	18.1835	18.3595	18.2715	NCBP2	18.0406	17.6566	17.8486	-0.422862	-0.390995	1.3113
Healthy Tissue (Control) - 35	STAGE4	GAPDH	18.5973	18.3557	18.4765	NCBP2	16.7168	17.9155	17.3161	-1.16034	-1.12847	2.18627
Healthy Tissue (Control) - 36	STAGE4	GAPDH	18.3956	18.7589	18.5773	NCBP2	18.277	18.4193	18.3481	-0.229136	-0.197269	1.14653
Healthy Tissue (Control) - 37	STAGE4	GAPDH	18.2238	18.7233	18.4735	NCBP2	19.7428	19.3652	19.554	1.08052	1.11239	0.462528
Healthy Tissue (Control) - 38	STAGE4	GAPDH	18.5973	18.3557	18.4765	NCBP2	16.7168	17.9155	17.3161	-1.16034	-1.12847	2.18627
Healthy Tissue (Control) - 39	STAGE4	GAPDH	18.2238	18.7233	18.4735	NCBP2	19.7428	19.3652	19.554	1.08052	1.11239	0.462528
Healthy Tissue (Control) - 40	STAGE4	GAPDH	18.9155	18.7168	18.8161	NCBP2	18.0149	18.7468	18.3808	-0.435333	-0.403467	1.32268
OSCC Tissue - 1	STAGE 1	GAPDH	18.8431	18.6291	18.7361	NCBP2	17.085	17.4782	17.2816	-1.4545	-1.42264	2.68075
OSCC Tissue - 2	STAGE 1	GAPDH	18.5807	18.6182	18.5995	NCBP2	18.831	18.5179	18.6744	0.0749854	0.106852	0.928612
OSCC Tissue - 3	STAGE 1	GAPDH	17.5539	17.2992	17.4266	NCBP2	17.5196	18.1348	17.8272	0.400653	0.432519	0.740967
OSCC Tissue - 4	STAGE 1	GAPDH	18.8431	18.6291	18.7361	NCBP2	18.8813	19.7685	19.3249	0.588788	0.620654	0.650376
OSCC Tissue - 5	STAGE 1	GAPDH	17.4629	17.1431	17.303	NCBP2	17.1769	18.8992	18.0381	0.735077	0.766944	0.587661
OSCC Tissue - 6	STAGE 1	GAPDH	18.8834	18.6723	18.7779	NCBP2	17.5196	18.1348	17.8272	-0.95066	-0.918794	1.89053
OSCC Tissue - 7	STAGE 1	GAPDH	19.0406	18.5547	18.7976	NCBP2	19.8457	18.5225	19.1841	0.386449	0.418316	0.748298
OSCC Tissue - 8	STAGE 1	GAPDH	17.4629	17.1431	17.303	NCBP2	18.6816	18.9669	18.8243	1.52128	1.55314	0.340767
OSCC Tissue - 9	STAGE 1	GAPDH	18.7985	18.7025	18.7505	NCBP2	19.085	19.4782	19.2816	0.531101	0.562968	0.676908
OSCC Tissue - 10	STAGE 1	GAPDH	19.0406	18.5547	18.7976	NCBP2	19.8457	18.5225	19.1841	0.386449	0.418316	0.748298
OSCC Tissue - 11	STAGE 2	GAPDH	18.2695	18.4512	18.3604	NCBP2	19.2873	18.2325	18.7599	-0.12792	-0.0960538	1.06885
OSCC Tissue - 12	STAGE 2	GAPDH	18.1932	18.241	18.2171	NCBP2	18.3585	18.6372	18.4978	0.280729	0.312596	0.805192
OSCC Tissue - 13	STAGE 2	GAPDH	19.1406	18.5447	18.8426	NCBP2	19.085	17.4782	18.2816	-0.561029	-0.529162	1.44309
OSCC Tissue - 14	STAGE 2	GAPDH	18.2645	18.4522	18.3584	NCBP2	18.831	18.5179	18.6744	0.316059	0.347926	0.785713
OSCC Tissue - 15	STAGE 2	GAPDH	18.8431	18.6291	18.7361	NCBP2	17.5196	18.1348	17.8272	-0.908901	-0.877034	1.8366
OSCC Tissue - 16	STAGE 2	GAPDH	18.1932	18.241	18.2171	NCBP2	18.3585	18.6372	18.4978	0.280729	0.312596	0.805192
OSCC Tissue - 17	STAGE 2	GAPDH	19.1406	18.5447	18.8426	NCBP2	19.085	19.4782	19.2816	0.438971	0.470838	0.721545
OSCC Tissue - 18	STAGE 2	GAPDH	17.554	17.2992	17.4266	NCBP2	17.1769	18.8992	18.0381	0.611472	0.643338	0.64023
OSCC Tissue - 19	STAGE 2	GAPDH	18.5807	18.6183	18.5995	NCBP2	18.8813	19.7685	19.3249	0.725396	0.757263	0.591618
OSCC Tissue - 20	STAGE 2	GAPDH	17.554	17.2992	17.4266	NCBP2	17.1769	18.8992	18.0381	0.611472	0.643338	0.64023
OSCC Tissue - 21	STAGE 3	GAPDH	18.8834	18.6423	18.7629	NCBP2	18.6816	18.9569	18.8193	0.0563741	0.0882408	0.940669
OSCC Tissue - 22	STAGE 3	GAPDH	17.3629	17.1441	17.2535	NCBP2	19.8457	18.5245	19.1851	1.93162	1.96348	0.256408
OSCC Tissue - 23	STAGE 3	GAPDH	17.5539	17.2992	17.4266	NCBP2	19.2873	18.2345	18.7609	0.807886	0.839752	0.55874
OSCC Tissue - 24	STAGE 3	GAPDH	18.7985	18.8025	18.8005	NCBP2	18.3584	18.6372	18.4978	-0.302724	-0.270857	1.20652
OSCC Tissue - 25	STAGE 3	GAPDH	18.1932	18.241	18.2171	NCBP2	19.085	19.4782	19.2816	1.06451	1.09638	0.46769
OSCC Tissue - 26	STAGE 3	GAPDH	19.1406	18.6547	18.8976	NCBP2	19.2873	18.2345	18.7609	-0.663187	-0.63132	1.54898
OSCC Tissue - 27	STAGE 3	GAPDH	18.7985	18.8025	18.8005	NCBP2	18.3584	18.6372	18.4978	-0.302724	-0.270857	1.20652
OSCC Tissue - 28	STAGE 3	GAPDH	18.1932	18.241	18.2171	NCBP2	18.8312	18.5178	18.6745	0.45738	0.489247	0.712397
OSCC Tissue - 29	STAGE 3	GAPDH	18.2695	18.4512	18.3604	NCBP2	17.5196	18.1348	17.8272	-0.533158	-0.501292	1.41548
OSCC Tissue - 30	STAGE 3	GAPDH	18.8431	18.6291	18.7361	NCBP2	18.8813	19.7685	19.3249	0.588782	0.620649	0.650378
OSCC Tissue - 31	STAGE4	GAPDH	18.5807	18.6182	18.5995	NCBP2	17.1769	18.8992	18.0381	-0.561398	-0.529531	1.44346
OSCC Tissue - 32	STAGE4	GAPDH	18.1932	18.241	18.2171	NCBP2	18.6816	18.9669	18.8243	0.607147	0.639013	0.642152
OSCC Tissue - 33	STAGE4	GAPDH	18.8824	18.6723	18.7774	NCBP2	19.8457	18.5225	19.1841	0.406714	0.43858	0.73786
OSCC Tissue - 34	STAGE4	GAPDH	17.4629	17.1631	17.313	NCBP2	18.8816	18.967	18.9243	1.61133	1.64319	0.320147
OSCC Tissue - 35	STAGE4	GAPDH	18.7985	18.7025	18.7505	NCBP2	19.8657	18.7225	19.2941	0.543579	0.575446	0.671079
OSCC Tissue - 36	STAGE4	GAPDH	18.8834	18.6723	18.7779	NCBP2	19.2973	18.3325	18.8149	-0.445423	-0.413556	1.33196
OSCC Tissue - 37	STAGE4	GAPDH	17.4639	17.1431	17.3035	NCBP2	18.6585	18.6372	18.6479	1.34437	1.37624	0.385221
OSCC Tissue - 38	STAGE4	GAPDH	18.8824	18.6723	18.7774	NCBP2	18.8816	18.967	18.9243	0.146924	0.17879	0.883443
OSCC Tissue - 39	STAGE4	GAPDH	17.4629	17.1631	17.313	NCBP2	19.8657	19.7225	19.7941	2.48112	2.51298	0.175193
OSCC Tissue - 40	STAGE4	GAPDH	18.7985	18.7025	18.7505	NCBP2	19.2873	18.2326	18.7599	-0.517957	-0.486091	1.40064

## Sheet: NOTCH 1
Sample Name		Target Name (Endogenous Control)	Cт Value (Duplicate)		Cт Mean (GAPDH)	Target Name (Gene of Interest)	Cт Value (Duplicate)		Cт Mean (LAG3)	Fold Change Calculation (FC=2^-ΔΔCt)
	STAGING									ΔCt	ΔΔCt	Fold Change				Healthy Tissue	BC Tissue
Healthy Tissue (Control) - 1	STAGE 1	GAPDH	16.7761	16.8539	16.8702	NOTCH 1	17.6764	17.8137	18.5849	1.71478	0.747858	0.595487			AVERAGE	1.07953	2.62956
Healthy Tissue (Control) - 2	STAGE 1	GAPDH	17.1032	17.0355	16.8746	NOTCH 1	19.2228	16.5275	18.9404	2.06581	1.09889	0.466876			SD	0.410704	0.658481
Healthy Tissue (Control) - 3	STAGE 1	GAPDH	16.8917	16.8575	16.8001	NOTCH 1	19.5861	18.2169	18.0041	1.20404	0.237112	0.848442			SE	0.129876	0.20823
Healthy Tissue (Control) - 4	STAGE 1	GAPDH	16.7806	16.8196	17.5326	NOTCH 1	19.0397	18.7247	18.8763	1.34362	0.376694	0.7702			average of delta Ct of Control		0.966925
Healthy Tissue (Control) - 5	STAGE 1	GAPDH	17.6547	17.4106	16.815	NOTCH 1	18.5587	18.0692	17.9567	1.14174	0.174812	0.885883
Healthy Tissue (Control) - 6	STAGE 1	GAPDH	16.7517	16.9886	17.1226	NOTCH 1	17.1625	18.1302	18.3195	1.19695	0.230021	0.852623
Healthy Tissue (Control) - 7	STAGE 1	GAPDH	16.9974	17.2477	17.3388	NOTCH 1	18.949	18.071	17.6412	0.302383	-0.664541	1.58506
Healthy Tissue (Control) - 8	STAGE 1	GAPDH	17.2769	17.4007	17.0694	NOTCH 1	19.5766	18.3741	18.314	1.2446	0.277671	0.824922
Healthy Tissue (Control) - 9	STAGE 1	GAPDH	17.8417	17.9172	17.2719	NOTCH 1	17.4948	17.9359	17.6463	0.374383	-0.592541	1.5079
Healthy Tissue (Control) - 10	STAGE 1	GAPDH	17.2672	17.2767	17.4035	NOTCH 1	19.0623	17.2692	17.7154	0.311891	-0.655034	1.57465
Healthy Tissue (Control) - 11	STAGE 2	GAPDH	17.3683	17.4387	16.9401	NOTCH 1	18.6126	18.0264	18.1658	1.22565	0.258727	0.835825
Healthy Tissue (Control) - 12	STAGE 2	GAPDH	17.4721	16.4081	16.2645	NOTCH 1	18.8891	18.2808	17.7451	1.48055	0.513629	0.700458
Healthy Tissue (Control) - 13	STAGE 2	GAPDH	16.3634	16.1656	17.3974	NOTCH 1	19.7221	18.1588	17.8751	0.477687	-0.489238	1.4037
Healthy Tissue (Control) - 14	STAGE 2	GAPDH	17.8982	16.8967	16.7923	NOTCH 1	19.0025	17.0058	18.9015	2.10911	1.14219	0.453071
Healthy Tissue (Control) - 15	STAGE 2	GAPDH	16.7007	16.884	17.4606	NOTCH 1	19.0398	18.7127	18.8822	1.42157	0.454644	0.72969
Healthy Tissue (Control) - 16	STAGE 2	GAPDH	17.4097	17.5116	17.8795	NOTCH 1	17.2736	18.0088	18.51	0.630533	-0.336392	1.2626
Healthy Tissue (Control) - 17	STAGE 2	GAPDH	17.1893	17.2559	16.8393	NOTCH 1	18.505	18.1582	18.9753	2.13601	1.16909	0.444702
Healthy Tissue (Control) - 18	STAGE 2	GAPDH	16.7898	16.8888	17.5018	NOTCH 1	18.9795	16.8328	17.7375	0.235687	-0.731238	1.66006
Healthy Tissue (Control) - 19	STAGE 2	GAPDH	17.318	16.2107	17.632	NOTCH 1	18.8436	18.3868	18.9928	1.36082	0.393894	0.761072
Healthy Tissue (Control) - 20	STAGE 2	GAPDH	17.408	17.2111	17.5668	NOTCH 1	19.627	18.1382	18.3047	0.737945	-0.228979	1.17201
Healthy Tissue (Control) - 21	STAGE 3	GAPDH	17.5306	17.6673	17.3488	NOTCH 1	18.9983	17.1435	17.6268	0.278033	-0.688891	1.61204
Healthy Tissue (Control) - 22	STAGE 3	GAPDH	17.3802	17.3174	17.4519	NOTCH 1	19.2303	18.6944	17.7432	0.291291	-0.675634	1.5973
Healthy Tissue (Control) - 23	STAGE 3	GAPDH	17.3708	17.5331	17.5103	NOTCH 1	18.4408	18.2018	18.2679	0.757601	-0.209324	1.15615
Healthy Tissue (Control) - 24	STAGE 3	GAPDH	17.674	17.3465	16.7643	NOTCH 1	19.0321	16.8814	17.8556	1.0912	0.124279	0.917462
Healthy Tissue (Control) - 25	STAGE 3	GAPDH	17.043	16.8683	17.6153	NOTCH 1	17.3216	17.9936	18.3316	0.716295	-0.250629	1.18973
Healthy Tissue (Control) - 26	STAGE 3	GAPDH	18.2092	17.0214	17.8278	NOTCH 1	17.8239	18.1838	17.9061	0.0783369	-0.888588	1.85136
Healthy Tissue (Control) - 27	STAGE 3	GAPDH	17.9188	17.7368	17.8894	NOTCH 1	17.7306	17.974	18.6152	0.725783	-0.241142	1.18193
Healthy Tissue (Control) - 28	STAGE 3	GAPDH	17.7815	17.9973	16.9556	NOTCH 1	19.2507	17.4641	18.8826	1.92691	0.95999	0.514061
Healthy Tissue (Control) - 29	STAGE 3	GAPDH	16.7297	17.5807	17.9021	NOTCH 1	17.9593	17.9577	18.0709	0.168787	-0.798138	1.73886
Healthy Tissue (Control) - 30	STAGE 3	GAPDH	17.9675	17.8367	17.5299	NOTCH 1	17.5685	18.0726	18.9624	1.43247	0.465544	0.724198
Healthy Tissue (Control) - 31	STAGE4	GAPDH	17.5533	17.5065	17.2226	NOTCH 1	19.0946	17.5468	18.3213	1.0987	0.131771	0.912711
Healthy Tissue (Control) - 32	STAGE4	GAPDH	17.4401	16.1541	17.3095	NOTCH 1	17.6186	17.7791	17.6576	0.348033	-0.618891	1.53569
Healthy Tissue (Control) - 33	STAGE4	GAPDH	17.3585	17.5286	17.5989	NOTCH 1	17.5248	18.1524	17.8206	0.221641	-0.745284	1.6763
Healthy Tissue (Control) - 34	STAGE4	GAPDH	16.2033	16.1884	17.4917	NOTCH 1	19.0443	18.9413	18.3207	0.829001	-0.137924	1.10032
Healthy Tissue (Control) - 35	STAGE4	GAPDH	17.9918	17.1417	16.6275	NOTCH 1	18.3067	18.3027	17.6989	1.07135	0.104429	0.930173
Healthy Tissue (Control) - 36	STAGE4	GAPDH	18.0163	16.9874	17.4932	NOTCH 1	17.2993	17.9544	17.8386	0.345391	-0.621534	1.53851
Healthy Tissue (Control) - 37	STAGE4	GAPDH	17.4154	17.5711	17.1552	NOTCH 1	17.5583	17.9281	18.3574	1.2022	0.235276	0.849522
Healthy Tissue (Control) - 38	STAGE4	GAPDH	17.6834	17.5806	16.7971	NOTCH 1	19.2677	17.268	17.9585	1.1614	0.194479	0.873888
Healthy Tissue (Control) - 39	STAGE4	GAPDH	17.6967	17.2867	17.4435	NOTCH 1	17.8926	17.8185	18.0039	0.560341	-0.406584	1.32554
Healthy Tissue (Control) - 40	STAGE4	GAPDH	17.1688	16.0862	16.1958	NOTCH 1	18.9088	16.5663	17.8523	1.65645	0.689529	0.620056
OSCC Tissue - 1	STAGE 1	GAPDH	16.9837	17.9243	17.454	NOTCH 1	16.382	18.0986	17.2403	-0.213736	-1.18066	2.26681
OSCC Tissue - 2	STAGE 1	GAPDH	16.7909	16.4167	16.6038	NOTCH 1	16.8141	16.8178	16.816	0.21216	-0.754765	1.68736
OSCC Tissue - 3	STAGE 1	GAPDH	16.8885	17.8634	17.3759	NOTCH 1	17.294	16.4224	16.8582	-0.517715	-1.48464	2.79847
OSCC Tissue - 4	STAGE 1	GAPDH	17.2506	17.4004	17.3255	NOTCH 1	17.6562	17.782	17.7191	0.393602	-0.573323	1.48795
OSCC Tissue - 5	STAGE 1	GAPDH	17.4455	18.3361	17.8908	NOTCH 1	17.225	17.8567	17.5408	-0.349966	-1.31689	2.49129
OSCC Tissue - 6	STAGE 1	GAPDH	17.0586	18.0273	17.543	NOTCH 1	16.9511	16.4105	16.6808	-0.862187	-1.82911	3.55318
OSCC Tissue - 7	STAGE 1	GAPDH	16.7526	18.0012	17.3769	NOTCH 1	17.094	16.5354	16.8147	-0.562165	-1.52909	2.88604
OSCC Tissue - 8	STAGE 1	GAPDH	17.1385	17.9551	17.5468	NOTCH 1	16.9431	16.343	16.643	-0.903787	-1.87071	3.65713
OSCC Tissue - 9	STAGE 1	GAPDH	17.2744	18.9675	18.1209	NOTCH 1	16.6565	17.1922	16.9243	-1.19661	-2.16353	4.4801
OSCC Tissue - 10	STAGE 1	GAPDH	17.6206	18.1646	17.8926	NOTCH 1	17.2366	17.9017	17.5691	-0.323466	-1.29039	2.44594
OSCC Tissue - 11	STAGE 2	GAPDH	18.611	18.1733	18.3921	NOTCH 1	17.5469	18.2428	17.8949	-0.497251	-1.46418	2.75906
OSCC Tissue - 12	STAGE 2	GAPDH	17.117	17.9808	17.5489	NOTCH 1	18.0572	16.2173	17.1372	-0.411664	-1.37859	2.60014
OSCC Tissue - 13	STAGE 2	GAPDH	16.9346	17.7415	17.3381	NOTCH 1	16.1085	16.939	16.5237	-0.814336	-1.78126	3.43726
OSCC Tissue - 14	STAGE 2	GAPDH	16.8514	16.267	16.5592	NOTCH 1	16.6941	17.7124	17.2033	0.644055	-0.32287	1.25082
OSCC Tissue - 15	STAGE 2	GAPDH	17.2614	17.8636	17.5625	NOTCH 1	17.9217	16.1404	17.031	-0.531464	-1.49839	2.82527
OSCC Tissue - 16	STAGE 2	GAPDH	17.0258	18.2077	17.6168	NOTCH 1	17.9836	16.5675	17.2755	-0.341237	-1.30816	2.47626
OSCC Tissue - 17	STAGE 2	GAPDH	17.221	17.5638	17.3924	NOTCH 1	16.6809	16.5842	16.6326	-0.759849	-1.72677	3.30987
OSCC Tissue - 18	STAGE 2	GAPDH	16.9948	17.8015	17.3981	NOTCH 1	16.9978	16.4136	16.7057	-0.692415	-1.65934	3.15872
OSCC Tissue - 19	STAGE 2	GAPDH	17.4307	17.4713	17.451	NOTCH 1	16.7813	16.4531	16.6172	-0.833799	-1.80072	3.48395
OSCC Tissue - 20	STAGE 2	GAPDH	17.1359	18.2377	17.6868	NOTCH 1	17.9651	16.6166	17.2908	-0.395987	-1.36291	2.57204
OSCC Tissue - 21	STAGE 3	GAPDH	17.1156	18.7441	17.9298	NOTCH 1	17.5701	17.2472	17.4086	-0.521208	-1.48813	2.80526
OSCC Tissue - 22	STAGE 3	GAPDH	17.6217	18.0881	17.8549	NOTCH 1	17.2367	17.7809	17.5088	-0.346116	-1.31304	2.48465
OSCC Tissue - 23	STAGE 3	GAPDH	18.5242	18.2524	18.3883	NOTCH 1	17.6263	18.2747	17.9505	-0.43775	-1.40468	2.64758
OSCC Tissue - 24	STAGE 3	GAPDH	17.3952	18.6738	18.0345	NOTCH 1	17.3665	17.1911	17.2788	-0.755708	-1.72263	3.30038
OSCC Tissue - 25	STAGE 3	GAPDH	17.355	17.4296	17.3923	NOTCH 1	17.9091	18.0789	17.994	0.601701	-0.365224	1.28808
OSCC Tissue - 26	STAGE 3	GAPDH	17.269	17.8345	17.5517	NOTCH 1	17.9906	16.2622	17.1264	-0.425364	-1.39229	2.62495
OSCC Tissue - 27	STAGE 3	GAPDH	16.8768	17.8221	17.3495	NOTCH 1	16.3101	18.1582	17.2341	-0.115336	-1.08226	2.11735
OSCC Tissue - 28	STAGE 3	GAPDH	16.6904	16.5219	16.6062	NOTCH 1	16.5949	16.3164	16.4557	-0.15048	-1.1174	2.16956
OSCC Tissue - 29	STAGE 3	GAPDH	16.8703	17.7825	17.3264	NOTCH 1	17.0475	17.3753	17.2114	-0.11496	-1.08189	2.1168
OSCC Tissue - 30	STAGE 3	GAPDH	17.3548	17.3583	17.3566	NOTCH 1	17.867	17.9018	17.8844	0.527851	-0.439074	1.35573
OSCC Tissue - 31	STAGE4	GAPDH	17.0414	18.0641	17.5528	NOTCH 1	17.0698	17.3339	17.2018	-0.350937	-1.31786	2.49296
OSCC Tissue - 32	STAGE4	GAPDH	17.3434	18.7695	18.0564	NOTCH 1	17.9745	17.1907	17.5826	-0.473858	-1.44078	2.71468
OSCC Tissue - 33	STAGE4	GAPDH	17.604	18.2779	17.941	NOTCH 1	17.2783	17.648	17.4631	-0.477816	-1.44474	2.72214
OSCC Tissue - 34	STAGE4	GAPDH	18.44	18.34	18.39	NOTCH 1	17.4471	18.2811	17.8641	-0.52585	-1.49278	2.8143
OSCC Tissue - 35	STAGE4	GAPDH	17.1631	17.7857	17.4744	NOTCH 1	17.7405	16.2135	16.977	-0.497413	-1.46434	2.75937
OSCC Tissue - 36	STAGE4	GAPDH	17.552	18.1126	17.8323	NOTCH 1	17.318	17.6838	17.5009	-0.331441	-1.29837	2.4595
OSCC Tissue - 37	STAGE4	GAPDH	18.311	18.1673	18.2391	NOTCH 1	17.4925	18.288	17.8903	-0.34885	-1.31578	2.48936
OSCC Tissue - 38	STAGE4	GAPDH	17.2219	17.7799	17.5009	NOTCH 1	18.016	16.3942	17.2051	-0.295814	-1.26274	2.39951
OSCC Tissue - 39	STAGE4	GAPDH	18.4724	18.5651	18.2092	NOTCH 1	17.6369	18.191	17.6534	-0.55585	-1.56469	2.95814
OSCC Tissue - 40	STAGE4	GAPDH	17.2129	17.9238	17.3965	NOTCH 1	17.8452	16.2149	16.9023	-0.494163	-1.503	2.83432

## Sheet: PTEN
Sample Name		Target Name (Endogenous Control)	Cт Value (Duplicate)		Cт Mean (GAPDH)	Target Name (Gene of Interest)	Cт Value (Duplicate)		Cт Mean (LAG3)	Fold Change Calculation (FC=2^-ΔΔCt)
	STAGING									ΔCt	ΔΔCt	Fold Change				Healthy Tissue	BC Tissue
Healthy Tissue (Control) - 1	STAGE 1	GAPDH	17.0189	16.3192	16.6691	PTEN	17.955	17.6339	17.7944	1.12537	0.639652	0.641868
Healthy Tissue (Control) - 2	STAGE 1	GAPDH	18.4468	18.7784	18.6126	PTEN	19.9626	19.2798	19.6212	1.00864	0.522921	0.695961			AVERAGE	1.0896	0.389007
Healthy Tissue (Control) - 3	STAGE 1	GAPDH	16.5638	17.4681	17.0159	PTEN	18.5559	17.2776	17.9167	0.900799	0.41508	0.749978			SD	0.450876	0.369409
Healthy Tissue (Control) - 4	STAGE 1	GAPDH	18.3162	18.989	18.6526	PTEN	18.2354	17.4591	17.8473	-0.805322	-1.29104	2.44704			SE	0.142579	0.116817
Healthy Tissue (Control) - 5	STAGE 1	GAPDH	18.7157	17.8923	18.304	PTEN	18.4092	18.1295	18.2694	-0.0346774	-0.520396	1.43435			average of delta Ct of Control		0.485718
Healthy Tissue (Control) - 6	STAGE 1	GAPDH	17.0617	16.235	16.6484	PTEN	18.9337	18.3874	18.6605	2.01217	1.52645	0.34713
Healthy Tissue (Control) - 7	STAGE 1	GAPDH	18.2516	18.7188	18.4852	PTEN	17.8193	19.473	18.6462	0.160989	-0.324729	1.25243
Healthy Tissue (Control) - 8	STAGE 1	GAPDH	19.0322	16.8096	17.9209	PTEN	18.7209	18.1527	18.4368	0.515949	0.0302313	0.979263
Healthy Tissue (Control) - 9	STAGE 1	GAPDH	19.0368	18.2486	18.6427	PTEN	18.6841	18.7879	18.736	0.0932969	-0.392421	1.31259
Healthy Tissue (Control) - 10	STAGE 1	GAPDH	19.1939	16.8218	18.0078	PTEN	18.6272	18.2467	18.437	0.429149	-0.0565687	1.03999
Healthy Tissue (Control) - 11	STAGE 2	GAPDH	16.972	17.7231	17.3476	PTEN	18.5457	18.7263	18.636	1.28847	0.802751	0.573255
Healthy Tissue (Control) - 12	STAGE 2	GAPDH	17.9376	17.7243	17.8309	PTEN	17.4071	18.252	17.8295	-0.00138402	-0.487102	1.40163
Healthy Tissue (Control) - 13	STAGE 2	GAPDH	17.8896	17.8055	17.8475	PTEN	17.3104	18.2282	17.7693	-0.078234	-0.563952	1.47831
Healthy Tissue (Control) - 14	STAGE 2	GAPDH	17.7827	17.3213	17.552	PTEN	18.7318	18.5497	18.6407	1.08872	0.603002	0.658383
Healthy Tissue (Control) - 15	STAGE 2	GAPDH	17.9035	17.4273	17.6654	PTEN	18.9842	18.4257	18.7049	1.03952	0.553802	0.681223
Healthy Tissue (Control) - 16	STAGE 2	GAPDH	18.2509	18.5267	18.3888	PTEN	18.9665	18.3709	18.6687	0.27993	-0.205789	1.15332
Healthy Tissue (Control) - 17	STAGE 2	GAPDH	18.3482	18.8587	18.6034	PTEN	19.0503	18.4819	18.7661	0.162678	-0.32304	1.25096
Healthy Tissue (Control) - 18	STAGE 2	GAPDH	16.4853	17.6309	17.0581	PTEN	18.343	18.2691	18.306	1.24795	0.762234	0.589582
Healthy Tissue (Control) - 19	STAGE 2	GAPDH	18.2303	19.0269	18.6286	PTEN	19.1379	18.3282	18.7331	0.104478	-0.38124	1.30246
Healthy Tissue (Control) - 20	STAGE 2	GAPDH	17.5243	17.7545	17.6394	PTEN	17.5932	17.043	17.3181	-0.321313	-0.807031	1.74961
Healthy Tissue (Control) - 21	STAGE 3	GAPDH	18.3186	17.2886	17.8036	PTEN	18.5869	18.8666	18.7268	0.923147	0.437429	0.73845
Healthy Tissue (Control) - 22	STAGE 3	GAPDH	19.2538	16.7822	18.018	PTEN	18.4154	19.3841	18.8998	0.8818	0.396082	0.759919
Healthy Tissue (Control) - 23	STAGE 3	GAPDH	16.6356	17.728	17.1818	PTEN	17.8024	18.8781	18.3403	1.15847	0.67275	0.62731
Healthy Tissue (Control) - 24	STAGE 3	GAPDH	18.0297	17.9261	17.9779	PTEN	19.3127	18.5283	18.9205	0.942616	0.456898	0.728551
Healthy Tissue (Control) - 25	STAGE 3	GAPDH	18.422	18.8506	18.6363	PTEN	18.8151	18.4667	18.6409	0.00463701	-0.481081	1.39579
Healthy Tissue (Control) - 26	STAGE 3	GAPDH	18.5909	18.548	18.5694	PTEN	18.3314	18.1448	18.2381	-0.331361	-0.81708	1.76184
Healthy Tissue (Control) - 27	STAGE 3	GAPDH	19.0039	16.2843	17.6441	PTEN	19.7805	18.4821	19.1313	1.48717	1.00145	0.499497
Healthy Tissue (Control) - 28	STAGE 3	GAPDH	18.2336	18.5166	18.3751	PTEN	18.7536	18.3493	18.5515	0.176387	-0.309331	1.23913
Healthy Tissue (Control) - 29	STAGE 3	GAPDH	18.4367	18.6347	18.5357	PTEN	18.6039	18.2941	18.449	-0.0867114	-0.57243	1.48703
Healthy Tissue (Control) - 30	STAGE 3	GAPDH	18.1872	19.1865	18.6868	PTEN	19.1921	18.3366	18.7644	0.0775285	-0.40819	1.32702
Healthy Tissue (Control) - 31	STAGE4	GAPDH	19.559	18.7873	19.1732	PTEN	17.453	20.0706	18.7618	-0.411374	-0.897092	1.86231
Healthy Tissue (Control) - 32	STAGE4	GAPDH	19.0051	18.4379	18.7215	PTEN	18.4165	18.8598	18.6382	-0.0833476	-0.569066	1.48356
Healthy Tissue (Control) - 33	STAGE4	GAPDH	19.2019	17.1046	18.1532	PTEN	18.449	19.2095	18.8293	0.676049	0.190331	0.876404
Healthy Tissue (Control) - 34	STAGE4	GAPDH	16.6299	17.9177	17.2738	PTEN	17.5126	18.8047	18.1587	0.884868	0.399149	0.758305
Healthy Tissue (Control) - 35	STAGE4	GAPDH	18.0173	17.7604	17.8888	PTEN	17.3753	18.4529	17.9141	0.0252655	-0.460453	1.37597
Healthy Tissue (Control) - 36	STAGE4	GAPDH	16.728	17.9766	17.3523	PTEN	17.5351	18.8818	18.2085	0.856168	0.370449	0.773542
Healthy Tissue (Control) - 37	STAGE4	GAPDH	18.4032	19.156	18.7796	PTEN	19.2662	18.3187	18.7925	0.012883	-0.472835	1.38783
Healthy Tissue (Control) - 38	STAGE4	GAPDH	16.4983	17.4075	16.9529	PTEN	17.368	18.2148	17.7914	0.838499	0.35278	0.783073
Healthy Tissue (Control) - 39	STAGE4	GAPDH	18.2572	19.1175	18.6873	PTEN	18.9939	18.5386	18.7663	0.078933	-0.406785	1.32573
Healthy Tissue (Control) - 40	STAGE4	GAPDH	17.6407	17.7778	17.7093	PTEN	17.5777	20.0407	18.8092	1.09992	0.614203	0.653291
OSCC Tissue - 1	STAGE 1	GAPDH	18.2102	18.1316	18.1709	PTEN	19.4738	19.3742	19.424	1.25309	0.767369	0.587488
OSCC Tissue - 2	STAGE 1	GAPDH	19.2159	18.8549	19.0354	PTEN	22.1366	21.2897	21.7132	2.67775	2.19203	0.218843
OSCC Tissue - 3	STAGE 1	GAPDH	18.234	18.1082	18.1711	PTEN	19.6231	19.4056	19.5143	1.34324	0.857519	0.551901
OSCC Tissue - 4	STAGE 1	GAPDH	17.5387	18.1432	17.8409	PTEN	18.696	18.51	18.603	0.762049	0.276331	0.825688
OSCC Tissue - 5	STAGE 1	GAPDH	17.2117	18.9967	18.1042	PTEN	21.0783	21.055	21.0667	2.96247	2.47675	0.179648
OSCC Tissue - 6	STAGE 1	GAPDH	18.3686	18.1375	18.2531	PTEN	21.2089	21.4946	21.3518	3.0987	2.61298	0.163461
OSCC Tissue - 7	STAGE 1	GAPDH	17.396	18.2119	17.8039	PTEN	18.6824	18.5043	18.5933	0.789399	0.303681	0.810182
OSCC Tissue - 8	STAGE 1	GAPDH	17.3848	18.6777	18.0312	PTEN	20.2599	20.0599	20.1599	2.12867	1.64295	0.3202
OSCC Tissue - 9	STAGE 1	GAPDH	17.4684	18.1515	17.81	PTEN	19.3016	19.4256	19.3636	1.55362	1.0679	0.477013
OSCC Tissue - 10	STAGE 1	GAPDH	18.9448	19.1784	19.0616	PTEN	18.5549	19.3423	18.9486	-0.11296	-0.598678	1.51433
OSCC Tissue - 11	STAGE 2	GAPDH	17.0366	16.8887	16.9627	PTEN	21.2055	19.6596	20.4326	3.4699	2.98419	0.126378
OSCC Tissue - 12	STAGE 2	GAPDH	17.4298	16.4843	16.957	PTEN	22.0614	22.7662	22.4138	5.45674	4.97102	0.031884
OSCC Tissue - 13	STAGE 2	GAPDH	18.9234	19.1172	19.0203	PTEN	21.6306	21.5837	21.6071	2.58684	2.10112	0.233077
OSCC Tissue - 14	STAGE 2	GAPDH	18.5216	18.2011	18.3614	PTEN	19.2379	19.2522	19.2451	0.883701	0.397983	0.758919
OSCC Tissue - 15	STAGE 2	GAPDH	17.3868	17.9984	17.6926	PTEN	21.4352	19.7461	20.5906	2.89805	2.41233	0.187852
OSCC Tissue - 16	STAGE 2	GAPDH	17.4212	16.4988	16.96	PTEN	19.9421	19.9393	19.9407	2.98069	2.49497	0.177394
OSCC Tissue - 17	STAGE 2	GAPDH	19.2069	18.6559	18.9314	PTEN	22.3233	22.5452	22.4343	3.50285	3.01713	0.123524
OSCC Tissue - 18	STAGE 2	GAPDH	18.3218	18.006	18.1639	PTEN	19.091	19.2648	19.1779	1.014	0.528283	0.693379
OSCC Tissue - 19	STAGE 2	GAPDH	17.5302	18.2821	17.9061	PTEN	19.4472	19.6216	19.5344	1.62825	1.14253	0.452964
OSCC Tissue - 20	STAGE 2	GAPDH	17.4738	18.9145	18.1941	PTEN	22.1794	21.0002	21.5898	3.39567	2.90995	0.133051
OSCC Tissue - 21	STAGE 3	GAPDH	17.4289	18.141	17.785	PTEN	21.3968	22.2164	21.8066	4.02162	3.5359	0.0862161
OSCC Tissue - 22	STAGE 3	GAPDH	18.8861	19.2475	19.0668	PTEN	19.5074	19.4639	19.4857	0.41889	-0.0668281	1.04741
OSCC Tissue - 23	STAGE 3	GAPDH	16.755	16.7915	16.7732	PTEN	21.2339	19.8073	20.5206	3.74736	3.26164	0.104267
OSCC Tissue - 24	STAGE 3	GAPDH	17.4886	16.5437	17.0161	PTEN	19.8153	19.9952	19.9052	2.88909	2.40337	0.189022
OSCC Tissue - 25	STAGE 3	GAPDH	18.9577	19.0293	18.9935	PTEN	22.493	21.3834	21.9382	2.94469	2.45897	0.181876
OSCC Tissue - 26	STAGE 3	GAPDH	18.5693	18.273	18.4212	PTEN	19.3735	19.3757	19.3746	0.953451	0.467733	0.7231
OSCC Tissue - 27	STAGE 3	GAPDH	17.5073	18.0409	17.7741	PTEN	19.5727	19.7913	19.682	1.9079	1.42218	0.373148
OSCC Tissue - 28	STAGE 3	GAPDH	19.0007	18.7428	18.8718	PTEN	22.2964	22.5634	22.4299	3.55815	3.07243	0.118879
OSCC Tissue - 29	STAGE 3	GAPDH	18.2866	18.0863	18.1865	PTEN	19.1236	19.2995	19.2116	1.0251	0.539383	0.688065
OSCC Tissue - 30	STAGE 3	GAPDH	17.525	18.0272	17.7761	PTEN	19.5561	19.6513	19.6037	1.8276	1.34188	0.394506
OSCC Tissue - 31	STAGE4	GAPDH	17.4094	18.9869	18.1981	PTEN	21.1607	21.1467	21.1537	2.95557	2.46985	0.180509
OSCC Tissue - 32	STAGE4	GAPDH	17.4326	18.0724	17.7525	PTEN	21.4746	22.2117	21.8431	4.09062	3.6049	0.0821897
OSCC Tissue - 33	STAGE4	GAPDH	18.8355	19.2449	19.0402	PTEN	18.7535	19.2745	19.014	-0.02616	-0.511878	1.42591
OSCC Tissue - 34	STAGE4	GAPDH	16.7622	16.827	16.7946	PTEN	21.1808	19.8798	20.5303	3.73571	3.24999	0.105113
OSCC Tissue - 35	STAGE4	GAPDH	17.5046	16.4739	16.9892	PTEN	21.9748	21.0198	21.4973	4.50804	4.02232	0.0615404
OSCC Tissue - 36	STAGE4	GAPDH	16.6995	16.7571	16.7283	PTEN	20.9864	19.9229	20.4547	3.72636	3.24064	0.105796
OSCC Tissue - 37	STAGE4	GAPDH	17.5492	16.4608	17.005	PTEN	20.0377	19.8899	19.9638	2.95879	2.47307	0.180107
OSCC Tissue - 38	STAGE4	GAPDH	19.1408	18.9236	19.0322	PTEN	22.58	21.6125	22.0962	3.06404	2.57832	0.167436
OSCC Tissue - 39	STAGE4	GAPDH	17.4768	16.3368	16.9068	PTEN	22.7517	22.7805	22.7661	5.85929	5.37357	0.0241209
OSCC Tissue - 40	STAGE4	GAPDH	16.905	16.988	16.9465	PTEN	21.2937	19.8013	20.5475	3.60101	3.11529	0.1154

## Sheet: RB1
Sample Name		Target Name (Endogenous Control)	Cт Value (Duplicate)		Cт Mean (GAPDH)	Target Name (Gene of Interest)	Cт Value (Duplicate)		Cт Mean (LAG3)	Fold Change Calculation (FC=2^-ΔΔCt)
	STAGING									ΔCt	ΔΔCt	Fold Change				Healthy Tissue	BC Tissue
Healthy Tissue (Control) - 1	STAGE 1	GAPDH	18.7335	18.8016	18.7675	RB1	22.0015	21.865	21.9333	3.16574	0.564875	0.676014
Healthy Tissue (Control) - 2	STAGE 1	GAPDH	17.6518	18.5103	18.0811	RB1	20.7354	20.8801	20.8077	2.72668	0.12582	0.916483			AVERAGE	1.11543	1.07787	1.03484	NO CHANGE
Healthy Tissue (Control) - 3	STAGE 1	GAPDH	17.9795	18.8119	18.3957	RB1	20.3508	22.3342	21.3425	2.94682	0.345961	0.786784			SD	0.534295	0.457788
Healthy Tissue (Control) - 4	STAGE 1	GAPDH	18.4798	19.0794	18.7796	RB1	22.1308	21.921	22.0259	3.24628	0.645414	0.639309			SE	0.168959	0.144765
Healthy Tissue (Control) - 5	STAGE 1	GAPDH	19.0535	19.105	19.0792	RB1	21.7294	21.272	21.5007	2.42149	-0.179367	1.13239			average of delta Ct of Control		2.60086
Healthy Tissue (Control) - 6	STAGE 1	GAPDH	17.9819	19.2441	18.613	RB1	21.8672	19.7438	20.8055	2.19253	-0.408327	1.32715
Healthy Tissue (Control) - 7	STAGE 1	GAPDH	18.6817	18.8877	18.7847	RB1	20.7513	23.0417	21.8965	3.11179	0.510926	0.701772
Healthy Tissue (Control) - 8	STAGE 1	GAPDH	17.9361	17.8385	17.8873	RB1	21.9358	19.433	20.6844	2.79714	0.196281	0.872797
Healthy Tissue (Control) - 9	STAGE 1	GAPDH	17.6341	18.1216	17.8778	RB1	20.0827	21.8059	20.9443	3.06643	0.465566	0.724187
Healthy Tissue (Control) - 10	STAGE 1	GAPDH	17.7665	18.9688	18.3677	RB1	20.9759	21.8389	21.4074	3.03978	0.43892	0.737687
Healthy Tissue (Control) - 11	STAGE 2	GAPDH	18.7933	17.3489	18.0711	RB1	22.0053	20.7482	21.3768	3.30569	0.704827	0.613516
Healthy Tissue (Control) - 12	STAGE 2	GAPDH	18.8289	17.9525	18.3907	RB1	20.4391	19.6897	20.0644	1.67369	-0.927169	1.90154
Healthy Tissue (Control) - 13	STAGE 2	GAPDH	19.0822	18.7336	18.9079	RB1	20.7402	20.0812	20.4107	1.50279	-1.09807	2.14068
Healthy Tissue (Control) - 14	STAGE 2	GAPDH	17.6563	18.2098	17.933	RB1	20.3992	21.8449	21.122	3.18901	0.588144	0.665198
Healthy Tissue (Control) - 15	STAGE 2	GAPDH	18.0717	18.7095	18.3906	RB1	21.6227	22.6567	22.1397	3.74914	1.14828	0.451163
Healthy Tissue (Control) - 16	STAGE 2	GAPDH	17.4057	19.1211	18.2634	RB1	21.7964	22.2172	22.0068	3.74339	1.14252	0.452966
Healthy Tissue (Control) - 17	STAGE 2	GAPDH	18.4925	17.9473	18.2199	RB1	21.1844	20.9007	21.0426	2.82265	0.221789	0.857501
Healthy Tissue (Control) - 18	STAGE 2	GAPDH	18.9147	17.2529	18.0838	RB1	19.5815	20.2039	19.8927	1.80889	-0.791975	1.73144
Healthy Tissue (Control) - 19	STAGE 2	GAPDH	19.2366	17.4383	18.3374	RB1	22.2825	20.7563	21.5194	3.18198	0.581118	0.668445
Healthy Tissue (Control) - 20	STAGE 2	GAPDH	18.9048	19.1993	19.0521	RB1	21.2163	21.5629	21.3896	2.33756	-0.263301	1.20022
Healthy Tissue (Control) - 21	STAGE 3	GAPDH	18.5107	19.3023	18.9065	RB1	20.7203	20.893	20.8067	1.90018	-0.700686	1.62528
Healthy Tissue (Control) - 22	STAGE 3	GAPDH	19.0163	18.1646	18.5905	RB1	21.9044	21.9288	21.9166	3.32616	0.725296	0.604873
Healthy Tissue (Control) - 23	STAGE 3	GAPDH	17.6033	18.6666	18.1349	RB1	20.198	20.121	20.1595	2.02457	-0.576296	1.49102
Healthy Tissue (Control) - 24	STAGE 3	GAPDH	17.5385	19.3298	18.4341	RB1	21.6337	21.8107	21.7222	3.28806	0.687201	0.621058
Healthy Tissue (Control) - 25	STAGE 3	GAPDH	17.2746	18.1278	17.7012	RB1	19.3645	21.2983	20.3314	2.63025	0.0293874	0.979836
Healthy Tissue (Control) - 26	STAGE 3	GAPDH	18.9978	18.7203	18.8591	RB1	20.9674	21.1924	21.0799	2.22084	-0.380021	1.30136
Healthy Tissue (Control) - 27	STAGE 3	GAPDH	18.0463	18.6875	18.3669	RB1	20.3539	20.9308	20.6423	2.27542	-0.325439	1.25305
Healthy Tissue (Control) - 28	STAGE 3	GAPDH	18.692	18.8984	18.7952	RB1	20.6811	21.1832	20.9322	2.13694	-0.463917	1.37928
Healthy Tissue (Control) - 29	STAGE 3	GAPDH	17.7754	18.7948	18.2851	RB1	20.5503	21.2424	20.8964	2.61128	0.0104189	0.992804
Healthy Tissue (Control) - 30	STAGE 3	GAPDH	18.7655	18.783	18.7742	RB1	21.0544	22.0334	21.5439	2.76967	0.168807	0.889578
Healthy Tissue (Control) - 31	STAGE4	GAPDH	17.3678	17.605	17.4864	RB1	19.5245	20.2285	19.8765	2.39017	-0.210694	1.15724
Healthy Tissue (Control) - 32	STAGE4	GAPDH	17.1009	18.6576	17.8792	RB1	22.1025	20.211	21.1567	3.27748	0.676616	0.625631
Healthy Tissue (Control) - 33	STAGE4	GAPDH	18.2873	17.5877	17.9375	RB1	19.6661	19.8683	19.7672	1.82975	-0.771111	1.70658
Healthy Tissue (Control) - 34	STAGE4	GAPDH	18.0873	17.3988	17.743	RB1	19.5681	20.2409	19.9045	2.16148	-0.43938	1.35602
Healthy Tissue (Control) - 35	STAGE4	GAPDH	17.4495	18.1788	17.8141	RB1	20.0907	19.4605	19.7756	1.96145	-0.639414	1.5577
Healthy Tissue (Control) - 36	STAGE4	GAPDH	18.5407	17.7444	18.1425	RB1	22.249	22.351	22.3	4.15743	1.55657	0.339959
Healthy Tissue (Control) - 37	STAGE4	GAPDH	19.0158	19.2472	19.1315	RB1	21.9734	19.5815	20.7774	1.64597	-0.954891	1.93843
Healthy Tissue (Control) - 38	STAGE4	GAPDH	18.8138	18.7333	18.7736	RB1	20.2541	19.5535	19.9038	1.13023	-1.47063	2.77144
Healthy Tissue (Control) - 39	STAGE4	GAPDH	18.7979	19.1736	18.9857	RB1	22.0743	19.5431	20.8087	1.82298	-0.777886	1.71462
Healthy Tissue (Control) - 40	STAGE4	GAPDH	18.365	19.0449	18.705	RB1	20.7343	21.565	21.1497	2.4447	-0.156165	1.11432
OSCC Tissue - 1	STAGE 1	GAPDH	18.8025	19.3251	19.0638	RB1	20.5089	21.7861	21.1475	2.08376	-0.5171	1.43108
OSCC Tissue - 2	STAGE 1	GAPDH	18.8014	19.2958	19.0486	RB1	22.531	20.6664	21.5987	2.55008	-0.0507783	1.03582
OSCC Tissue - 3	STAGE 1	GAPDH	18.8025	18.8772	18.8398	RB1	21.8678	20.6437	21.2558	2.41593	-0.18493	1.13676
OSCC Tissue - 4	STAGE 1	GAPDH	18.4022	19.0188	18.7105	RB1	20.9319	21.2601	21.096	2.3855	-0.215365	1.161
OSCC Tissue - 5	STAGE 1	GAPDH	18.4029	18.4022	18.4026	RB1	22.5269	20.0266	21.2767	2.8742	0.273336	0.827404
OSCC Tissue - 6	STAGE 1	GAPDH	19.2831	19.2126	19.2479	RB1	21.3905	22.3544	21.8724	2.62458	0.0237199	0.983693
OSCC Tissue - 7	STAGE 1	GAPDH	18.7709	18.5563	18.6636	RB1	20.0054	21.4463	20.7259	2.06227	-0.538587	1.45255
OSCC Tissue - 8	STAGE 1	GAPDH	18.5487	18.4029	18.4758	RB1	21.3576	22.8373	22.0975	3.62166	1.02079	0.492845
OSCC Tissue - 9	STAGE 1	GAPDH	18.7328	18.6515	18.6921	RB1	21.5032	21.9828	21.743	3.05086	0.45	0.732043
OSCC Tissue - 10	STAGE 1	GAPDH	18.7851	19.1957	18.9904	RB1	22.464	20.6015	21.5328	2.54236	-0.0585043	1.04139
OSCC Tissue - 11	STAGE 2	GAPDH	18.5492	19.0669	18.808	RB1	21.0283	22.0743	21.5513	3.26626	0.665398	0.630515
OSCC Tissue - 12	STAGE 2	GAPDH	18.6102	18.8648	18.7375	RB1	19.4186	21.2763	20.3474	1.60995	-0.990909	1.98744
OSCC Tissue - 13	STAGE 2	GAPDH	18.8589	18.5276	18.6932	RB1	20.991	21.2795	21.1352	2.442	-0.158857	1.1164
OSCC Tissue - 14	STAGE 2	GAPDH	19.2831	18.9709	19.127	RB1	21.9814	21.8049	21.8932	2.76615	0.165285	0.891752
OSCC Tissue - 15	STAGE 2	GAPDH	19.6283	19.2637	19.446	RB1	21.8429	21.6205	21.7317	2.28573	-0.315135	1.24413
OSCC Tissue - 16	STAGE 2	GAPDH	18.622	18.8577	18.7398	RB1	22.4052	20.1273	21.2663	2.52644	-0.074421	1.05294
OSCC Tissue - 17	STAGE 2	GAPDH	18.1268	17.7142	17.9205	RB1	19.6762	20.7167	20.1965	2.27596	-0.324903	1.25258
OSCC Tissue - 18	STAGE 2	GAPDH	18.1083	18.9647	18.5365	RB1	20.6913	20.4596	20.5755	2.03896	-0.561902	1.47621
OSCC Tissue - 19	STAGE 2	GAPDH	17.4906	18.1097	17.8001	RB1	20.8899	22.282	21.586	3.78582	1.18496	0.439838
OSCC Tissue - 20	STAGE 2	GAPDH	19.1339	18.7334	18.9336	RB1	21.0982	20.2768	20.6875	1.75384	-0.847018	1.79878
OSCC Tissue - 21	STAGE 3	GAPDH	18.1097	18.4953	18.3025	RB1	19.6629	22.3413	21.0021	2.69961	0.0987513	0.933841
OSCC Tissue - 22	STAGE 3	GAPDH	18.4136	17.2803	17.8469	RB1	21.0973	20.6289	20.8631	3.01617	0.415305	0.749861
OSCC Tissue - 23	STAGE 3	GAPDH	18.4022	18.5648	18.4835	RB1	20.8498	21.6205	21.2352	3.13705	0.536192	0.689589
OSCC Tissue - 24	STAGE 3	GAPDH	18.1953	17.9012	18.0483	RB1	21.2658	21.0466	21.1562	3.1079	0.507034	0.703668
OSCC Tissue - 25	STAGE 3	GAPDH	18.1268	18.4029	18.2648	RB1	20.807	21.5326	21.1698	2.90497	0.304104	0.809945
OSCC Tissue - 26	STAGE 3	GAPDH	18.4029	19.0188	18.7108	RB1	19.5802	20.9809	20.2805	1.5697	-1.03116	2.04367
OSCC Tissue - 27	STAGE 3	GAPDH	18.633	18.3475	18.4902	RB1	21.1514	20.3211	20.7362	2.24601	-0.354852	1.27885
OSCC Tissue - 28	STAGE 3	GAPDH	18.4029	18.1097	18.2563	RB1	22.4275	21.0215	21.7245	3.46824	0.867378	0.548142
OSCC Tissue - 29	STAGE 3	GAPDH	18.1097	18.9801	18.5449	RB1	19.4335	21.0948	20.2641	1.71928	-0.881584	1.8424
OSCC Tissue - 30	STAGE 3	GAPDH	17.8924	18.5674	18.2299	RB1	21.4976	21.7212	21.6094	3.37949	0.778631	0.58292
OSCC Tissue - 31	STAGE4	GAPDH	18.4755	17.608	18.0418	RB1	19.2801	20.6664	19.9733	1.93152	-0.669339	1.59034
OSCC Tissue - 32	STAGE4	GAPDH	17.608	17.7172	17.6626	RB1	20.8091	21.7694	21.2893	3.62661	1.02575	0.491154
OSCC Tissue - 33	STAGE4	GAPDH	17.4906	17.7838	17.6372	RB1	20.9513	21.1492	21.0502	3.41299	0.812132	0.56954
OSCC Tissue - 34	STAGE4	GAPDH	17.2831	18.7851	18.0341	RB1	20.896	21.2763	21.0861	3.24215	0.641288	0.64114
OSCC Tissue - 35	STAGE4	GAPDH	17.2831	18.8056	18.0444	RB1	19.3581	21.0411	20.1996	2.15523	-0.445631	1.36191
OSCC Tissue - 36	STAGE4	GAPDH	19.0188	18.9647	18.9918	RB1	22.0498	22.0393	22.0446	3.05281	0.451945	0.731056
OSCC Tissue - 37	STAGE4	GAPDH	19.1262	18.9541	19.0401	RB1	20.8421	20.4079	20.625	1.58489	-1.01597	2.02226
OSCC Tissue - 38	STAGE4	GAPDH	19.2995	19.1957	19.2476	RB1	20.6913	20.6015	21.6051	2.35746	-0.243402	1.18378
OSCC Tissue - 39	STAGE4	GAPDH	18.8025	19.0669	18.9347	RB1	19.3581	20.3143	19.8362	0.901526	-1.69934	3.24751
OSCC Tissue - 40	STAGE4	GAPDH	18.5879	19.1857	18.8868	RB1	21.9899	21.2202	20.6464	1.75959	-0.841267	1.79162

## Sheet: TP53
Sample Name		Target Name (Endogenous Control)	Cт Value (Duplicate)		Cт Mean (GAPDH)	Target Name (Gene of Interest)	Cт Value (Duplicate)		Cт Mean (LAG3)	Fold Change Calculation (FC=2^-ΔΔCt)
	STAGING									ΔCt	ΔΔCt	Fold Change				Healthy Tissue	BC Tissue
Healthy Tissue (Control) - 1	STAGE 1	GAPDH	16.74	17.407	17.0735	TP53	16.9466	16.4842	16.7154	-0.358119	-0.87613	1.83545
Healthy Tissue (Control) - 2	STAGE 1	GAPDH	17.3956	16.5502	16.9729	TP53	17.4869	17.3226	17.4048	0.431902	-0.0861094	1.0615			AVERAGE	1.16842	0.934964
Healthy Tissue (Control) - 3	STAGE 1	GAPDH	18.5094	19.2625	18.8859	TP53	18.0433	17.9607	18.002	-0.883948	-1.40196	2.6426			SD	0.685835	0.938025
Healthy Tissue (Control) - 4	STAGE 1	GAPDH	16.1145	17.7135	16.914	TP53	18.1613	17.7967	17.979	1.06494	0.546928	0.684476			SE	0.21688	0.29663
Healthy Tissue (Control) - 5	STAGE 1	GAPDH	18.073	16.8783	17.4757	TP53	18.6791	18.2059	18.4425	0.966832	0.448821	0.732641			average of delta Ct of Control		0.518011
Healthy Tissue (Control) - 6	STAGE 1	GAPDH	17.0681	17.4702	17.2691	TP53	17.9437	17.9872	17.9655	0.696349	0.178338	0.88372
Healthy Tissue (Control) - 7	STAGE 1	GAPDH	16.9349	17.6384	17.2867	TP53	17.707	17.3711	17.539	0.252388	-0.265623	1.20216
Healthy Tissue (Control) - 8	STAGE 1	GAPDH	16.692	17.3941	17.0431	TP53	17.8001	18.0799	17.94	0.896925	0.378914	0.769016
Healthy Tissue (Control) - 9	STAGE 1	GAPDH	17.0219	17.962	17.492	TP53	18.4797	18.6704	18.5751	1.08311	0.565094	0.675911
Healthy Tissue (Control) - 10	STAGE 1	GAPDH	17.4275	16.439	16.9332	TP53	17.9719	18.1896	18.0808	1.14754	0.629528	0.646388
Healthy Tissue (Control) - 11	STAGE 2	GAPDH	18.4404	19.2215	18.8309	TP53	18.7779	19.1145	18.9462	0.115272	-0.40274	1.32202
Healthy Tissue (Control) - 12	STAGE 2	GAPDH	18.278	17.2993	17.7886	TP53	17.9256	18.9864	18.456	0.667353	0.149342	0.901662
Healthy Tissue (Control) - 13	STAGE 2	GAPDH	18.0266	16.6747	17.3507	TP53	16.8618	16.2851	16.5734	-0.777247	-1.29526	2.45421
Healthy Tissue (Control) - 14	STAGE 2	GAPDH	16.9588	17.4969	17.2278	TP53	18.6744	18.0803	18.3773	1.14951	0.631497	0.645506
Healthy Tissue (Control) - 15	STAGE 2	GAPDH	18.8711	17.7395	18.3053	TP53	18.8367	19.1786	19.0077	0.702389	0.184378	0.880029
Healthy Tissue (Control) - 16	STAGE 2	GAPDH	16.2036	17.8433	17.0234	TP53	17.9072	17.9884	17.9478	0.924355	0.406344	0.754533
Healthy Tissue (Control) - 17	STAGE 2	GAPDH	18.2012	19.0165	18.6089	TP53	17.6136	17.3282	17.4709	-1.13795	-1.65596	3.15134
Healthy Tissue (Control) - 18	STAGE 2	GAPDH	18.1551	17.4118	17.7834	TP53	18.0886	17.8461	17.9673	0.183918	-0.334093	1.26058
Healthy Tissue (Control) - 19	STAGE 2	GAPDH	16.1114	17.7746	16.943	TP53	16.9715	16.5235	16.7475	-0.195537	-0.713549	1.63983
Healthy Tissue (Control) - 20	STAGE 2	GAPDH	18.2065	16.7559	17.4812	TP53	18.5637	18.2234	18.3935	0.912345	0.394334	0.76084
Healthy Tissue (Control) - 21	STAGE 3	GAPDH	18.2053	18.9526	18.579	TP53	18.2295	18.7626	18.4961	-0.0828958	-0.600907	1.51667
Healthy Tissue (Control) - 22	STAGE 3	GAPDH	16.7917	17.3505	17.0711	TP53	17.9374	18.048	17.9927	0.921644	0.403633	0.755952
Healthy Tissue (Control) - 23	STAGE 3	GAPDH	18.8217	17.726	18.2738	TP53	18.8323	19.2776	19.055	0.78111	0.263098	0.833296
Healthy Tissue (Control) - 24	STAGE 3	GAPDH	16.4015	17.9302	17.1659	TP53	18.0652	18.7832	18.4242	1.2583	0.740291	0.598619
Healthy Tissue (Control) - 25	STAGE 3	GAPDH	16.2155	17.6258	16.9206	TP53	16.9203	16.4819	16.7011	-0.21953	-0.737541	1.66733
Healthy Tissue (Control) - 26	STAGE 3	GAPDH	17.1856	17.4576	17.3216	TP53	18.7861	19.1699	18.978	1.65644	1.13843	0.454254
Healthy Tissue (Control) - 27	STAGE 3	GAPDH	18.0949	19.1342	18.6145	TP53	17.9853	17.9802	17.9828	-0.631752	-1.14976	2.21878
Healthy Tissue (Control) - 28	STAGE 3	GAPDH	18.0635	17.4295	17.7465	TP53	17.5137	17.4201	17.4669	-0.279631	-0.797643	1.73826
Healthy Tissue (Control) - 29	STAGE 3	GAPDH	17.0463	17.8436	17.445	TP53	18.1787	17.8997	18.0392	0.594231	0.07622	0.94854
Healthy Tissue (Control) - 30	STAGE 3	GAPDH	17.663	16.3559	17.0095	TP53	16.8283	16.297	16.5627	-0.446823	-0.964834	1.95184
Healthy Tissue (Control) - 31	STAGE4	GAPDH	18.2395	19.1127	18.6761	TP53	18.6671	18.1317	18.3994	-0.276715	-0.794726	1.73475
Healthy Tissue (Control) - 32	STAGE4	GAPDH	18.908	17.4614	18.1847	TP53	18.2724	18.8741	18.5732	0.388497	-0.129514	1.09393
Healthy Tissue (Control) - 33	STAGE4	GAPDH	16.684	17.4163	17.0501	TP53	17.8818	18.2834	18.0826	1.03247	0.514456	0.700057
Healthy Tissue (Control) - 34	STAGE4	GAPDH	18.0391	16.7247	17.3819	TP53	18.692	19.1556	18.9238	1.54187	1.02386	0.491798
Healthy Tissue (Control) - 35	STAGE4	GAPDH	17.2584	17.6966	17.4775	TP53	18.0055	18.9495	18.4775	0.999995	0.481984	0.715993
Healthy Tissue (Control) - 36	STAGE4	GAPDH	17.7962	16.2561	17.0262	TP53	18.4987	18.906	18.7024	1.67621	1.1582	0.448072
Healthy Tissue (Control) - 37	STAGE4	GAPDH	18.3499	19.1107	18.7303	TP53	17.8669	18.2493	18.0581	-0.672157	-1.19017	2.28179
Healthy Tissue (Control) - 38	STAGE4	GAPDH	17.551	16.5602	17.0556	TP53	18.7498	19.2553	19.0026	1.94696	1.42895	0.371401
Healthy Tissue (Control) - 39	STAGE4	GAPDH	17.3246	17.9309	17.6278	TP53	18.0269	18.2936	18.1602	0.532462	0.0144503	0.990034
Healthy Tissue (Control) - 40	STAGE4	GAPDH	17.4578	16.3421	16.9	TP53	18.7709	19.3439	19.0574	2.15745	1.63944	0.320982
OSCC Tissue - 1	STAGE 1	GAPDH	17.0543	17.3705	17.2124	TP53	18.0125	16.8274	17.42	0.207526	-0.310486	1.24013
OSCC Tissue - 2	STAGE 1	GAPDH	16.6616	17.3899	17.0257	TP53	17.493	18.5109	18.002	0.976232	0.458221	0.727883
OSCC Tissue - 3	STAGE 1	GAPDH	17.885	18.1012	17.9931	TP53	19.1582	22.0196	20.5889	2.59576	2.07775	0.236884
OSCC Tissue - 4	STAGE 1	GAPDH	18.5321	17.6896	18.1108	TP53	18.7883	20.316	19.5522	1.44134	0.92333	0.527291
OSCC Tissue - 5	STAGE 1	GAPDH	17.0733	17.021	17.0471	TP53	19.2202	19.9211	19.5706	2.52352	2.00551	0.249048
OSCC Tissue - 6	STAGE 1	GAPDH	16.6716	17.3637	17.0176	TP53	17.321	18.5457	17.9333	0.915706	0.397695	0.75907
OSCC Tissue - 7	STAGE 1	GAPDH	17.925	17.9933	17.9592	TP53	19.2747	21.995	20.6349	2.67571	2.1577	0.224113
OSCC Tissue - 8	STAGE 1	GAPDH	17.3898	19.1922	18.291	TP53	17.1326	17.2449	17.1888	-1.10222	-1.62023	3.07424
OSCC Tissue - 9	STAGE 1	GAPDH	17.4166	17.2251	17.3208	TP53	18.708	18.9648	18.8364	1.51555	0.99754	0.500853
OSCC Tissue - 10	STAGE 1	GAPDH	17.5474	19.2154	18.3814	TP53	17.1561	17.2282	17.1922	-1.18923	-1.70724	3.26536
OSCC Tissue - 11	STAGE 2	GAPDH	18.2909	17.4081	17.8495	TP53	19.5978	21.2723	20.4351	2.58557	2.06756	0.238563
OSCC Tissue - 12	STAGE 2	GAPDH	18.3291	17.3609	17.845	TP53	18.2264	17.7939	18.0102	0.16516	-0.352851	1.27708
OSCC Tissue - 13	STAGE 2	GAPDH	16.8698	17.1502	17.01	TP53	18.1683	16.691	17.4296	0.419624	-0.0983868	1.07058
OSCC Tissue - 14	STAGE 2	GAPDH	16.9657	17.6347	17.3002	TP53	17.5939	18.5002	18.0471	0.746866	0.228855	0.853312
OSCC Tissue - 15	STAGE 2	GAPDH	17.0569	16.8162	16.9366	TP53	19.2022	19.8628	19.5325	2.5959	2.07789	0.23686
OSCC Tissue - 16	STAGE 2	GAPDH	18.3196	17.1517	17.7357	TP53	19.3827	21.1569	20.2698	2.53409	2.01608	0.247229
OSCC Tissue - 17	STAGE 2	GAPDH	18.4034	17.5697	17.9865	TP53	18.3919	17.9556	18.1738	0.187251	-0.33076	1.25768
OSCC Tissue - 18	STAGE 2	GAPDH	17.895	17.8854	17.8902	TP53	19.1445	21.9404	20.5425	2.65227	2.13425	0.227785
OSCC Tissue - 19	STAGE 2	GAPDH	18.4547	17.8546	18.1547	TP53	18.7971	20.3619	19.5795	1.42482	0.906806	0.533365
OSCC Tissue - 20	STAGE 2	GAPDH	16.9241	16.8316	16.8778	TP53	19.2185	19.9216	19.5701	2.69225	2.17424	0.221559
OSCC Tissue - 21	STAGE 3	GAPDH	18.1378	17.2626	17.7002	TP53	18.6287	18.9783	18.8035	1.10329	0.58528	0.66652
OSCC Tissue - 22	STAGE 3	GAPDH	17.4669	19.1375	18.3022	TP53	17.0355	17.316	17.1758	-1.12642	-1.64443	3.12625
OSCC Tissue - 23	STAGE 3	GAPDH	18.7183	17.4341	18.0762	TP53	19.4798	21.2232	20.3515	2.27534	1.75733	0.295796
OSCC Tissue - 24	STAGE 3	GAPDH	18.2191	18.269	18.2441	TP53	18.4295	17.6689	18.0492	-0.19488	-0.712892	1.63909
OSCC Tissue - 25	STAGE 3	GAPDH	16.8654	17.2967	17.081	TP53	18.1687	16.923	17.5458	0.464806	-0.0532049	1.03757
OSCC Tissue - 26	STAGE 3	GAPDH	16.7105	17.5795	17.145	TP53	17.3039	18.56	17.932	0.786991	0.26898	0.829906
OSCC Tissue - 27	STAGE 3	GAPDH	17.5556	19.1475	18.3515	TP53	17.0915	17.2995	17.1955	-1.15603	-1.67404	3.19107
OSCC Tissue - 28	STAGE 3	GAPDH	18.7814	17.2285	18.005	TP53	19.6686	20.9888	20.3287	2.32376	1.80575	0.286032
OSCC Tissue - 29	STAGE 3	GAPDH	17.8422	17.9632	17.9027	TP53	19.3293	22.0944	20.7118	2.80912	2.29111	0.204318
OSCC Tissue - 30	STAGE 3	GAPDH	18.278	17.8968	18.0874	TP53	18.5155	20.5441	19.5298	1.44242	0.924413	0.526895
OSCC Tissue - 31	STAGE4	GAPDH	17.2726	16.8702	17.0714	TP53	19.1467	20.0134	19.58	2.50865	1.99064	0.251627
OSCC Tissue - 32	STAGE4	GAPDH	17.3531	17.6197	17.4864	TP53	18.6964	19.0502	18.8733	1.38684	0.868831	0.54759
OSCC Tissue - 33	STAGE4	GAPDH	17.3674	19.2021	18.2847	TP53	17.0841	17.453	17.2686	-1.01619	-1.5342	2.89628
OSCC Tissue - 34	STAGE4	GAPDH	18.4292	17.1336	17.7814	TP53	19.478	20.9918	20.2349	2.45356	1.93555	0.261421
OSCC Tissue - 35	STAGE4	GAPDH	18.3513	17.5527	17.952	TP53	18.4498	17.9136	18.1817	0.229751	-0.28826	1.22117
OSCC Tissue - 36	STAGE4	GAPDH	16.9647	17.357	17.1608	TP53	17.523	18.3135	17.9182	0.757412	0.2394	0.847097
OSCC Tissue - 37	STAGE4	GAPDH	17.8717	18.0487	17.9602	TP53	19.1397	22.0284	20.5841	2.62387	2.10585	0.232314
OSCC Tissue - 38	STAGE4	GAPDH	18.5304	17.4554	17.9929	TP53	18.5632	20.4654	19.5143	1.52144	1.00343	0.498812
OSCC Tissue - 39	STAGE4	GAPDH	17.0763	16.9491	17.0127	TP53	19.2876	19.7748	19.5312	2.51854	2.00053	0.249909
OSCC Tissue - 40	STAGE4	GAPDH	18.563	17.3988	17.9809	TP53	19.3996	21.0878	20.2437	2.26278	1.74477	0.298382

## Sheet: AURKB
Sample Name		Target Name (Endogenous Control)	Cт Value (Duplicate)		Cт Mean (GAPDH)	Target Name (Gene of Interest)	Cт Value (Duplicate)		Cт Mean (LAG3)	Fold Change Calculation (FC=2^-ΔΔCt)
	STAGING									ΔCt	ΔΔCt	Fold Change						Healthy Tissue	BC Tissue
Healthy Tissue (Control) - 1	STAGE 1	GAPDH	17.3847	17.5829	17.4838	AURKB	18.641	18.2047	18.4229	0.939118	-0.906609	1.87463
Healthy Tissue (Control) - 2	STAGE 1	GAPDH	19.0301	19.87	19.45	AURKB	19.9102	20.9822	20.4462	0.996129	-0.849598	1.802					AVERAGE	1.17991	1.04787	1.126
Healthy Tissue (Control) - 3	STAGE 1	GAPDH	19.0117	18.6939	18.8528	AURKB	21.407	21.1621	21.2845	2.43171	0.585983	0.666195					SD	0.695062	0.621162
Healthy Tissue (Control) - 4	STAGE 1	GAPDH	19.0308	18.7581	18.8945	AURKB	20.156	20.2897	20.2228	1.32832	-0.517404	1.43138					SE	0.219798	0.196429
Healthy Tissue (Control) - 5	STAGE 1	GAPDH	18.7026	18.6863	18.6945	AURKB	19.7392	19.993	19.8661	1.17159	-0.674141	1.59565					average of delta Ct of Control		1.84573
Healthy Tissue (Control) - 6	STAGE 1	GAPDH	18.0785	17.3537	17.7161	AURKB	19.4766	19.0478	19.2622	1.54612	-0.299608	1.23081
Healthy Tissue (Control) - 7	STAGE 1	GAPDH	18.9444	19.1751	19.0597	AURKB	20.6698	20.8427	20.7563	1.69655	-0.149178	1.10894
Healthy Tissue (Control) - 8	STAGE 1	GAPDH	17.8586	17.8506	17.8546	AURKB	18.5707	19.9987	19.2847	1.4301	-0.415624	1.33388
Healthy Tissue (Control) - 9	STAGE 1	GAPDH	17.9139	17.9793	17.9466	AURKB	17.3445	21.1522	19.2484	1.30179	-0.543938	1.45795
Healthy Tissue (Control) - 10	STAGE 1	GAPDH	18.9786	18.5315	18.7551	AURKB	19.8946	20.9986	20.4466	1.69154	-0.15419	1.1128
Healthy Tissue (Control) - 11	STAGE 2	GAPDH	18.0091	17.9731	17.9911	AURKB	20.1343	18.6041	19.3692	1.37812	-0.467607	1.38281
Healthy Tissue (Control) - 12	STAGE 2	GAPDH	17.6252	17.6105	17.6178	AURKB	21.3676	21.3029	21.3353	3.71744	1.87171	0.273249
Healthy Tissue (Control) - 13	STAGE 2	GAPDH	18.906	18.9794	18.9427	AURKB	20.1752	21.0006	20.5879	1.64517	-0.200556	1.14914
Healthy Tissue (Control) - 14	STAGE 2	GAPDH	17.5031	18.1349	17.819	AURKB	19.5816	19.2034	19.3925	1.57352	-0.272204	1.20765
Healthy Tissue (Control) - 15	STAGE 2	GAPDH	18.0088	18.0199	18.0143	AURKB	19.1959	19.9978	19.5968	1.5825	-0.263227	1.20016
Healthy Tissue (Control) - 16	STAGE 2	GAPDH	17.3843	18.1816	17.7829	AURKB	18.6747	18.9315	18.8031	1.02019	-0.825537	1.7722
Healthy Tissue (Control) - 17	STAGE 2	GAPDH	17.2411	18.026	17.6335	AURKB	19.3872	19.1188	19.253	1.61946	-0.226263	1.1698
Healthy Tissue (Control) - 18	STAGE 2	GAPDH	17.6038	17.6439	17.6238	AURKB	19.3719	19.1693	19.2706	1.64677	-0.198957	1.14787
Healthy Tissue (Control) - 19	STAGE 2	GAPDH	18.5701	19.1018	18.836	AURKB	21.6193	21.2445	21.4319	2.59595	0.750219	0.594513
Healthy Tissue (Control) - 20	STAGE 2	GAPDH	18.0658	18.0341	18.0499	AURKB	19.3907	19.1405	19.2656	1.21566	-0.630064	1.54763
Healthy Tissue (Control) - 21	STAGE 3	GAPDH	17.6337	18.1551	17.8944	AURKB	17.5323	20.8442	19.1883	1.29387	-0.551855	1.46597
Healthy Tissue (Control) - 22	STAGE 3	GAPDH	17.9754	17.2123	17.5938	AURKB	19.5695	19.9669	19.7682	2.17441	0.328685	0.796262
Healthy Tissue (Control) - 23	STAGE 3	GAPDH	17.5217	17.3252	17.4234	AURKB	21.0677	19.9154	20.4916	3.06814	1.22241	0.428567
Healthy Tissue (Control) - 24	STAGE 3	GAPDH	18.9799	19.2502	19.115	AURKB	20.1601	19.4715	19.8158	0.700721	-1.14501	2.21147
Healthy Tissue (Control) - 25	STAGE 3	GAPDH	18.396	19.0061	18.7011	AURKB	21.306	20.5848	20.9454	2.24435	0.398624	0.758582
Healthy Tissue (Control) - 26	STAGE 3	GAPDH	17.0907	17.3052	17.198	AURKB	20.7511	20.9017	20.8264	3.62845	1.78272	0.290634
Healthy Tissue (Control) - 27	STAGE 3	GAPDH	18.7776	18.5251	18.6514	AURKB	20.7818	21.0783	20.93	2.27863	0.432901	0.740771
Healthy Tissue (Control) - 28	STAGE 3	GAPDH	17.9039	17.7699	17.8369	AURKB	20.2372	21.9565	21.0968	3.25989	1.41417	0.375226
Healthy Tissue (Control) - 29	STAGE 3	GAPDH	19.1944	19.0611	19.1277	AURKB	19.4489	19.1767	19.3128	0.185103	-1.66062	3.16153
Healthy Tissue (Control) - 30	STAGE 3	GAPDH	17.9742	17.7922	17.8832	AURKB	20.0135	18.8616	19.4376	1.55437	-0.291357	1.22379
Healthy Tissue (Control) - 31	STAGE4	GAPDH	18.0751	17.9102	17.9926	AURKB	20.1442	19.4684	19.8063	1.81363	-0.0320929	1.02249
Healthy Tissue (Control) - 32	STAGE4	GAPDH	18.5105	18.0564	18.2834	AURKB	21.2092	19.623	20.4161	2.13268	0.286952	0.819632
Healthy Tissue (Control) - 33	STAGE4	GAPDH	18.9283	17.6303	18.2793	AURKB	20.7673	20.8086	20.7879	2.50864	0.662917	0.6316
Healthy Tissue (Control) - 34	STAGE4	GAPDH	18.0969	17.2912	17.694	AURKB	19.6441	19.988	19.8161	2.12206	0.276335	0.825686
Healthy Tissue (Control) - 35	STAGE4	GAPDH	17.8475	18.2511	18.0493	AURKB	21.2092	20.8345	21.0219	2.97254	1.12682	0.457925
Healthy Tissue (Control) - 36	STAGE4	GAPDH	18.8019	17.6338	18.2178	AURKB	19.8662	19.9958	19.931	1.7132	-0.132532	1.09622
Healthy Tissue (Control) - 37	STAGE4	GAPDH	18.079	17.8766	17.9778	AURKB	20.3096	21.9638	21.1367	3.1589	1.31317	0.402436
Healthy Tissue (Control) - 38	STAGE4	GAPDH	19.0971	19.1977	19.1474	AURKB	19.4662	18.8598	19.163	0.0156482	-1.83008	3.55556
Healthy Tissue (Control) - 39	STAGE4	GAPDH	17.65	18.1994	17.9247	AURKB	17.524	20.8843	19.2042	1.27951	-0.56622	1.48064
Healthy Tissue (Control) - 40	STAGE4	GAPDH	18.1268	17.3709	17.7488	AURKB	21.306	20.5848	20.9454	3.19658	1.35085	0.39206
OSCC Tissue - 1	STAGE 1	GAPDH	18.1323	17.8154	17.9739	AURKB	20.5743	21.2413	20.9078	2.9339	1.08817	0.470357
OSCC Tissue - 2	STAGE 1	GAPDH	19.1729	18.495	18.834	AURKB	21.1906	21.6819	21.4362	2.60228	0.75655	0.59191
OSCC Tissue - 3	STAGE 1	GAPDH	18.6733	18.5267	18.6	AURKB	22.65	22.3127	22.4814	3.88136	2.03564	0.2439
OSCC Tissue - 4	STAGE 1	GAPDH	18.6395	19.0335	18.8365	AURKB	20.8073	20.3569	20.5821	1.74557	-0.100157	1.07189
OSCC Tissue - 5	STAGE 1	GAPDH	19.1531	18.5583	18.8557	AURKB	20.226	20.0996	20.1628	1.30708	-0.538643	1.45261
OSCC Tissue - 6	STAGE 1	GAPDH	18.4386	18.6328	18.5357	AURKB	19.4153	19.8786	19.647	1.11126	-0.734463	1.66378
OSCC Tissue - 7	STAGE 1	GAPDH	18.6118	18.5876	18.5997	AURKB	22.371	22.2055	22.2883	3.68856	1.84284	0.278773
OSCC Tissue - 8	STAGE 1	GAPDH	17.5318	17.8751	17.7035	AURKB	20.8138	20.2437	20.5287	2.82524	0.97951	0.507152
OSCC Tissue - 9	STAGE 1	GAPDH	18.5277	18.999	18.7633	AURKB	19.3265	20.0127	19.6696	0.906274	-0.939453	1.9178
OSCC Tissue - 10	STAGE 1	GAPDH	18.6909	18.9711	18.831	AURKB	19.537	20.3643	19.9507	1.11966	-0.726067	1.65412
OSCC Tissue - 11	STAGE 2	GAPDH	18.6118	18.5876	18.5997	AURKB	21.6951	21.4665	21.5808	2.86683	1.02111	0.492739
OSCC Tissue - 12	STAGE 2	GAPDH	17.8923	17.3528	17.6225	AURKB	20.9442	20.6066	20.7754	3.15289	1.30716	0.404115
OSCC Tissue - 13	STAGE 2	GAPDH	18.6949	19.225	18.96	AURKB	19.6614	21.2529	20.4571	1.49716	-0.348563	1.27329
OSCC Tissue - 14	STAGE 2	GAPDH	19.0591	19.0045	19.0318	AURKB	20.3067	20.9281	20.6174	1.58562	-0.260111	1.19757
OSCC Tissue - 15	STAGE 2	GAPDH	18.6127	18.9325	18.7726	AURKB	19.6499	19.184	19.417	0.644376	-1.20135	2.29955
OSCC Tissue - 16	STAGE 2	GAPDH	17.7402	18.5591	18.1497	AURKB	20.793	20.6643	20.7287	2.57901	0.733283	0.601534
OSCC Tissue - 17	STAGE 2	GAPDH	18.155	17.3813	17.7681	AURKB	19.5996	21.2304	20.415	2.64686	0.801135	0.573898
OSCC Tissue - 18	STAGE 2	GAPDH	17.6859	19.0103	18.3481	AURKB	20.0385	19.985	20.0117	1.66366	-0.182069	1.13451
OSCC Tissue - 19	STAGE 2	GAPDH	19.2315	18.653	18.9423	AURKB	21.1182	20.8518	20.985	2.04271	0.196982	0.872374
OSCC Tissue - 20	STAGE 2	GAPDH	18.6985	18.2743	18.4864	AURKB	20.1686	19.8633	20.0159	1.52952	-0.316205	1.24505
OSCC Tissue - 21	STAGE 3	GAPDH	18.5478	18.3245	18.4361	AURKB	19.5777	19.9298	19.7538	1.31763	-0.528097	1.44203
OSCC Tissue - 22	STAGE 3	GAPDH	18.6427	19.1245	18.8836	AURKB	20.3458	20.2705	20.3082	1.4246	-0.42113	1.33898
OSCC Tissue - 23	STAGE 3	GAPDH	18.0091	17.2279	17.6185	AURKB	17.7356	19.607	18.6713	1.98848	0.142753	0.905789
OSCC Tissue - 24	STAGE 3	GAPDH	17.8773	17.3663	17.6218	AURKB	20.9405	20.5193	20.7299	3.10814	1.26241	0.416846
OSCC Tissue - 25	STAGE 3	GAPDH	17.4234	17.9256	17.6745	AURKB	20.5727	20.0351	20.3039	2.62945	0.783724	0.580865
OSCC Tissue - 26	STAGE 3	GAPDH	19.1199	19.0609	19.0904	AURKB	18.0129	19.653	18.833	0.562619	-1.28311	2.43363
OSCC Tissue - 27	STAGE 3	GAPDH	18.512	19.1263	18.8191	AURKB	19.3784	21.0702	20.2243	1.40513	-0.440593	1.35716
OSCC Tissue - 28	STAGE 3	GAPDH	17.9223	17.5849	17.7536	AURKB	21.3311	21.7321	21.5316	3.77802	1.93229	0.262013
OSCC Tissue - 29	STAGE 3	GAPDH	18.6042	18.5518	18.578	AURKB	22.6478	22.3127	22.4803	3.90228	2.05655	0.24039
OSCC Tissue - 30	STAGE 3	GAPDH	18.0107	17.3863	17.6985	AURKB	19.9591	19.2556	19.6073	1.90886	0.0631305	0.957185
OSCC Tissue - 31	STAGE4	GAPDH	18.6694	18.5941	18.6317	AURKB	20.0261	19.7871	19.9066	1.27485	-0.570874	1.48542
OSCC Tissue - 32	STAGE4	GAPDH	17.5996	19.1246	18.3621	AURKB	19.2831	20.1362	19.7097	1.34757	-0.498153	1.4124
OSCC Tissue - 33	STAGE4	GAPDH	17.5979	17.9765	17.7872	AURKB	20.2107	20.0769	20.1438	2.35658	0.510852	0.701808
OSCC Tissue - 34	STAGE4	GAPDH	17.909	17.9737	17.9414	AURKB	21.7159	21.5599	21.6379	3.61856	1.77283	0.292633
OSCC Tissue - 35	STAGE4	GAPDH	18.7136	19.146	18.9298	AURKB	20.6698	20.5646	20.6172	1.6874	-0.158329	1.11599
OSCC Tissue - 36	STAGE4	GAPDH	18.784	18.788	18.786	AURKB	20.6754	20.4095	20.5425	1.75646	-0.0892686	1.06383
OSCC Tissue - 37	STAGE4	GAPDH	18.6531	18.8305	18.7418	AURKB	19.4401	21.079	20.2595	1.51773	-0.327998	1.25527
OSCC Tissue - 38	STAGE4	GAPDH	19.0061	19.0171	19.0116	AURKB	19.2943	19.6522	19.4733	0.461708	-1.38402	2.60994
OSCC Tissue - 39	STAGE4	GAPDH	18.3461	19.0735	18.7098	AURKB	21.956	21.4902	21.7231	2.78046	0.934737	0.523138
OSCC Tissue - 40	STAGE4	GAPDH	18.3461	19.0735	18.7098	AURKB	20.6597	20.6984	20.6791	1.96928	0.123557	0.917922
